# Supplementary material for: ESR1 mutant breast cancers show elevated basal cytokeratins and immune activation
Source: PubMed Central journal article supplement (PMC9019037; doi:10.1038/s41467-022-29498-9), 2022-04-19
Supplement: 41467_2022_29498_MOESM1_ESM.pdf [file 41467_2022_29498_MOESM1_ESM.pdf]

# Supplementary Figure 1

## a Charafe-Jauffret gene sets

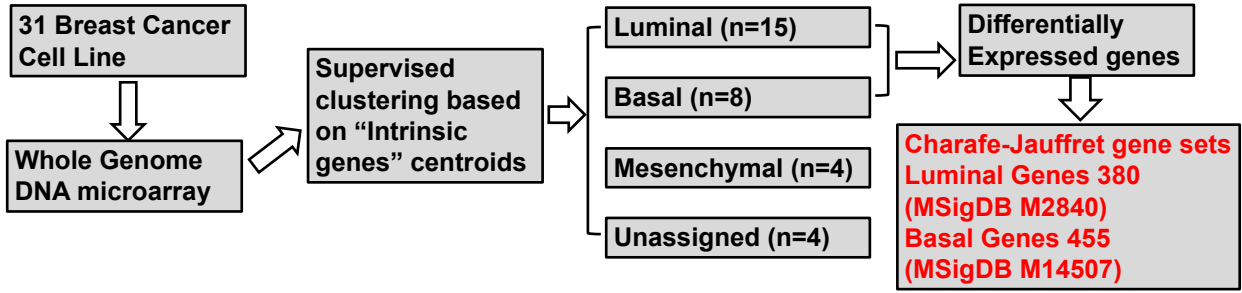

## b Huper gene sets

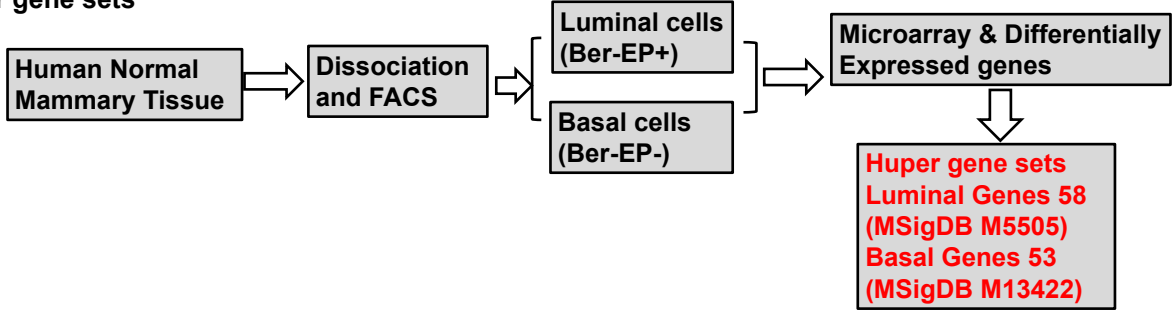

## c Sorlie gene sets

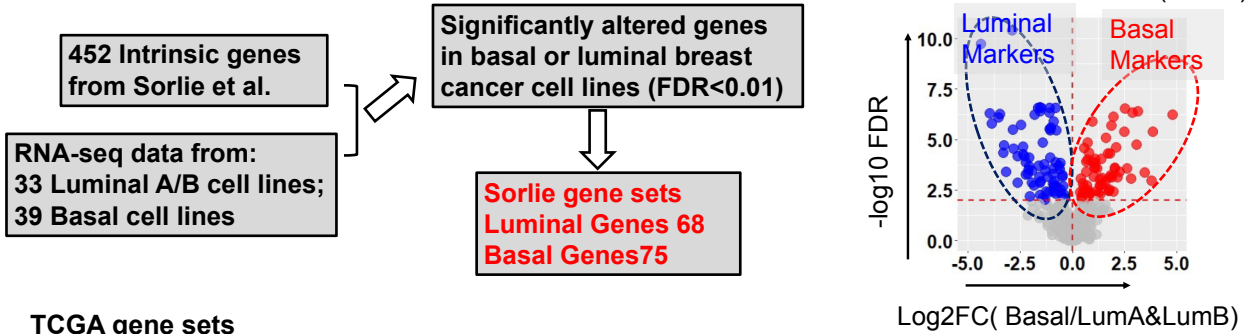

## d TCGA gene sets

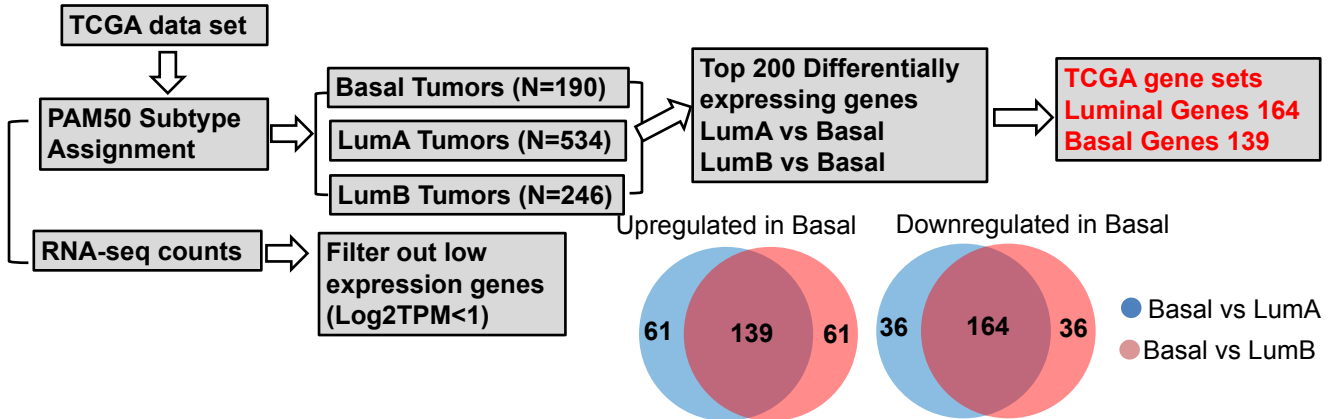

## e METABRIC gene sets

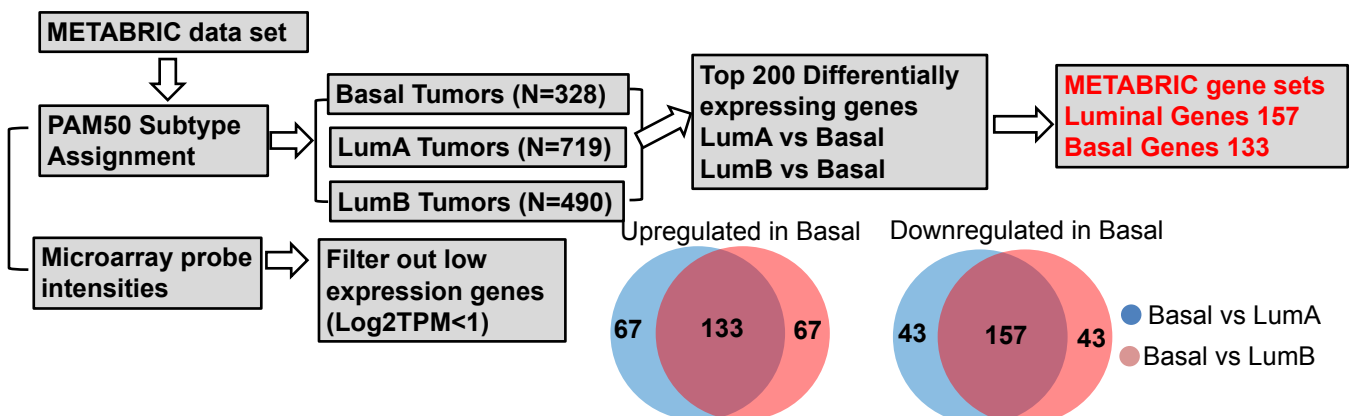

**Supplementary Figure 1. Schematic flow charts of the generation process of the four pairs of luminal/basal gene sets. (Related to Fig. 1)**

- a) Charafe-Jauffret gene set was obtained based on a microarray data of 31 breast cancer cell lines after supervised clustering and subtype assignment. Differentially expressed genes from 15 luminal and 8 basal breast cancer cells derived 380 and 455 luminal and basal genes.
- b) Huper gene set was computed based on microarray data of flow cytometry sorted basal and luminal epithelial cells from a normal human mammary tissue. This gene set contains 58 luminal and 53 basal genes.
- c) Sorlie gene set was derived based on the differentially expressed genes between 39 basal and 33 luminal breast cancer cell lines among the 452 intrinsic gene panel reported by Sorlie et al. The volcano plot on the right panel represents the differentially gene expression distribution of the 452 genes, genes with  $FDR < 0.01$  were highlighted and used for the gene sets.
- d) For the TCGA gene set, differentially expressed genes ( $FDR < 0.01$ ) were called between basal and luminal A or basal and luminal B ER+ tumors using raw counts after filtering out low expression genes (maximum  $\text{Log}_2$  TPM expression across all samples  $< 1$ ). The top 200 increased genes from these two comparisons were further intersected (Venn diagram). Shared upregulated ( $n=139$ ) or downregulated ( $n=164$ ) DE genes between basal-to-LumA and basal-to-LumB comparisons tumors were called as TCGA gene sets.
- e) For the METABRIC gene set, differentially expressed genes ( $FDR < 0.01$ ) were called between basal and luminal A or basal and luminal B ER+ tumors using normalized probe intensities of each gene. The top 200 increased genes from these two comparisons were further intersected (Venn diagram). Shared upregulated ( $n=133$ ) or downregulated ( $n=157$ ) DE genes between basal-to-LumA and basal-to-LumB comparisons tumors were called as METABRIC gene sets.

# Supplementary Figure 2

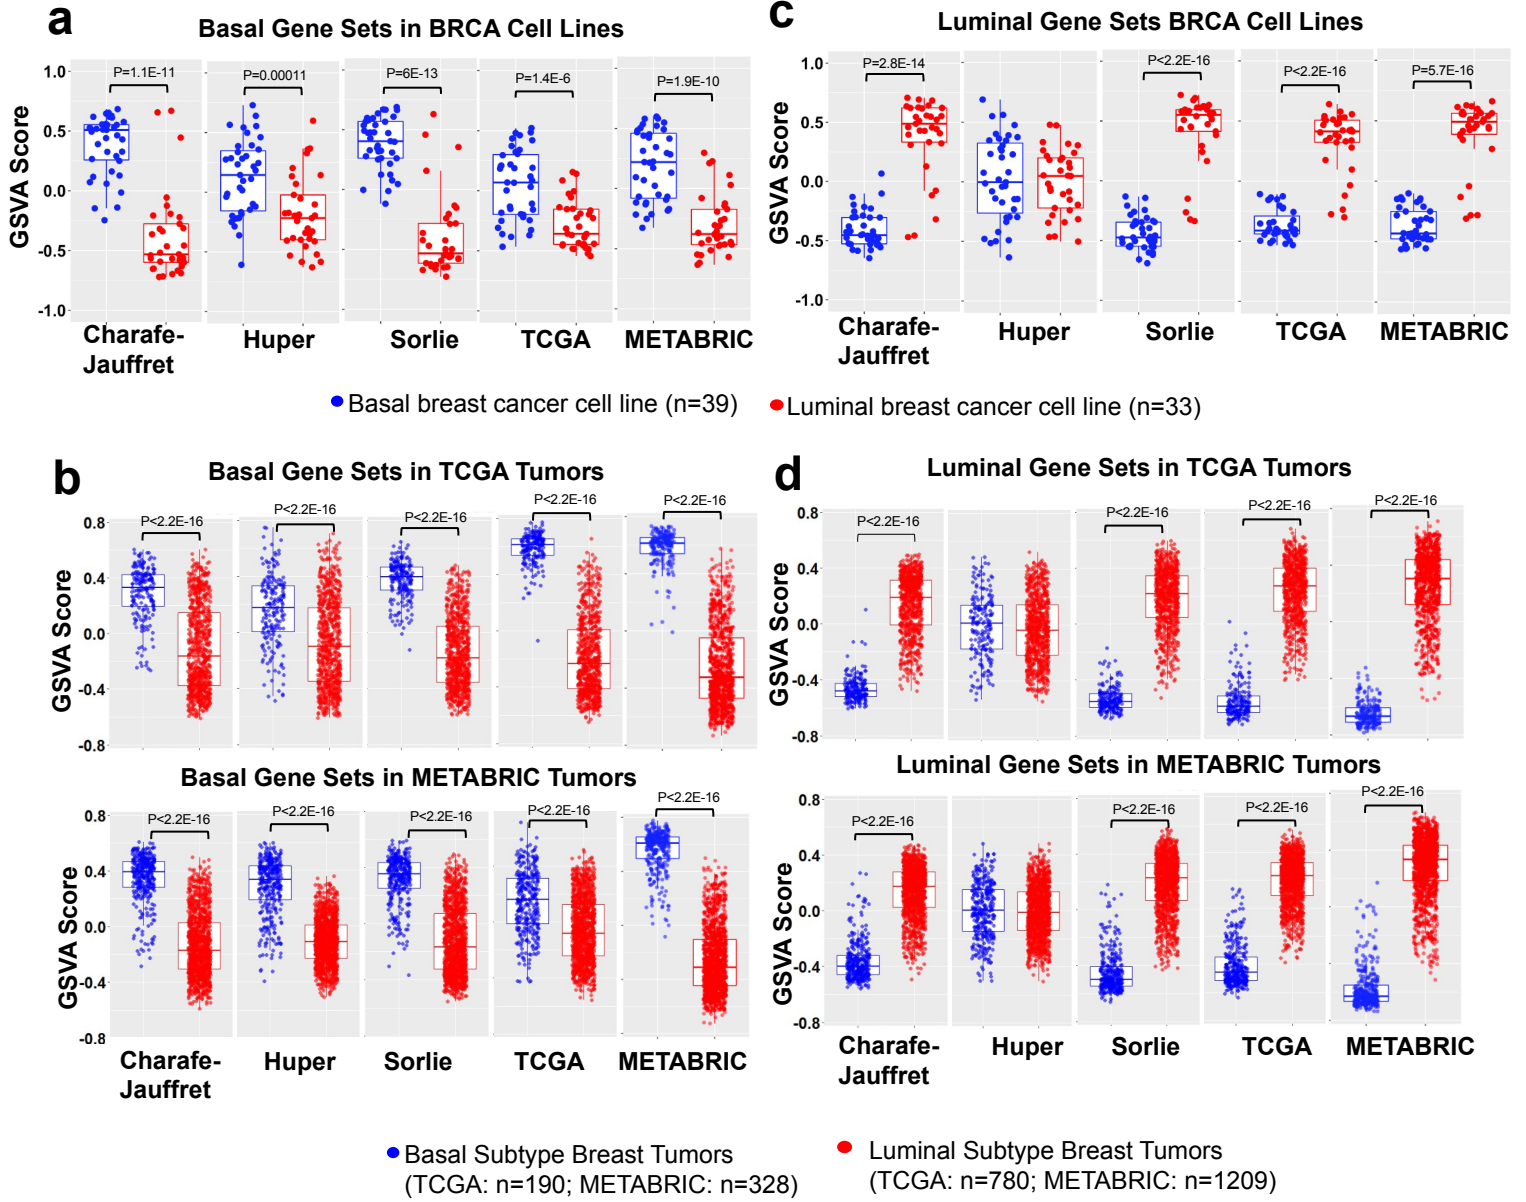

**Supplementary Figure 2. Quality control of the four pairs of luminal/basal gene sets in breast cancer cell lines and tumors. (Related to Fig. 1)**

a) and c) Dot plots showing GSVA score of the five pairs of basal (a) /luminal (c) gene sets enrichment in luminal (n=33) and basal (n=39) breast cancer cells as quality controls. Each plot represents mean  $\pm$  SD from GSVA score. Box plots span the upper quartile (upper limit), median (centre) and lower quartile (lower limit). Whiskers extend a maximum of 1.5X IQR. Mann Whitney U test was used within each group (\*\* p<0.01).

b) and d) Box plots showing GSVA score of the five pairs of basal (b) /luminal (d) gene sets enrichment in luminal and basal breast cancer tumors from TCGA (n=190 basal, n=780 luminal) and METABRIC (n=328 basal, n=1209 luminal) as quality controls. Box plots span the upper quartile (upper limit), median (centre) and lower quartile (lower limit). Whiskers extend a maximum of 1.5X IQR. Mann Whitney U test (two-sided) was used within each group.

Source data are provided as a Source Data file for a-d.

# Supplementary Figure 3

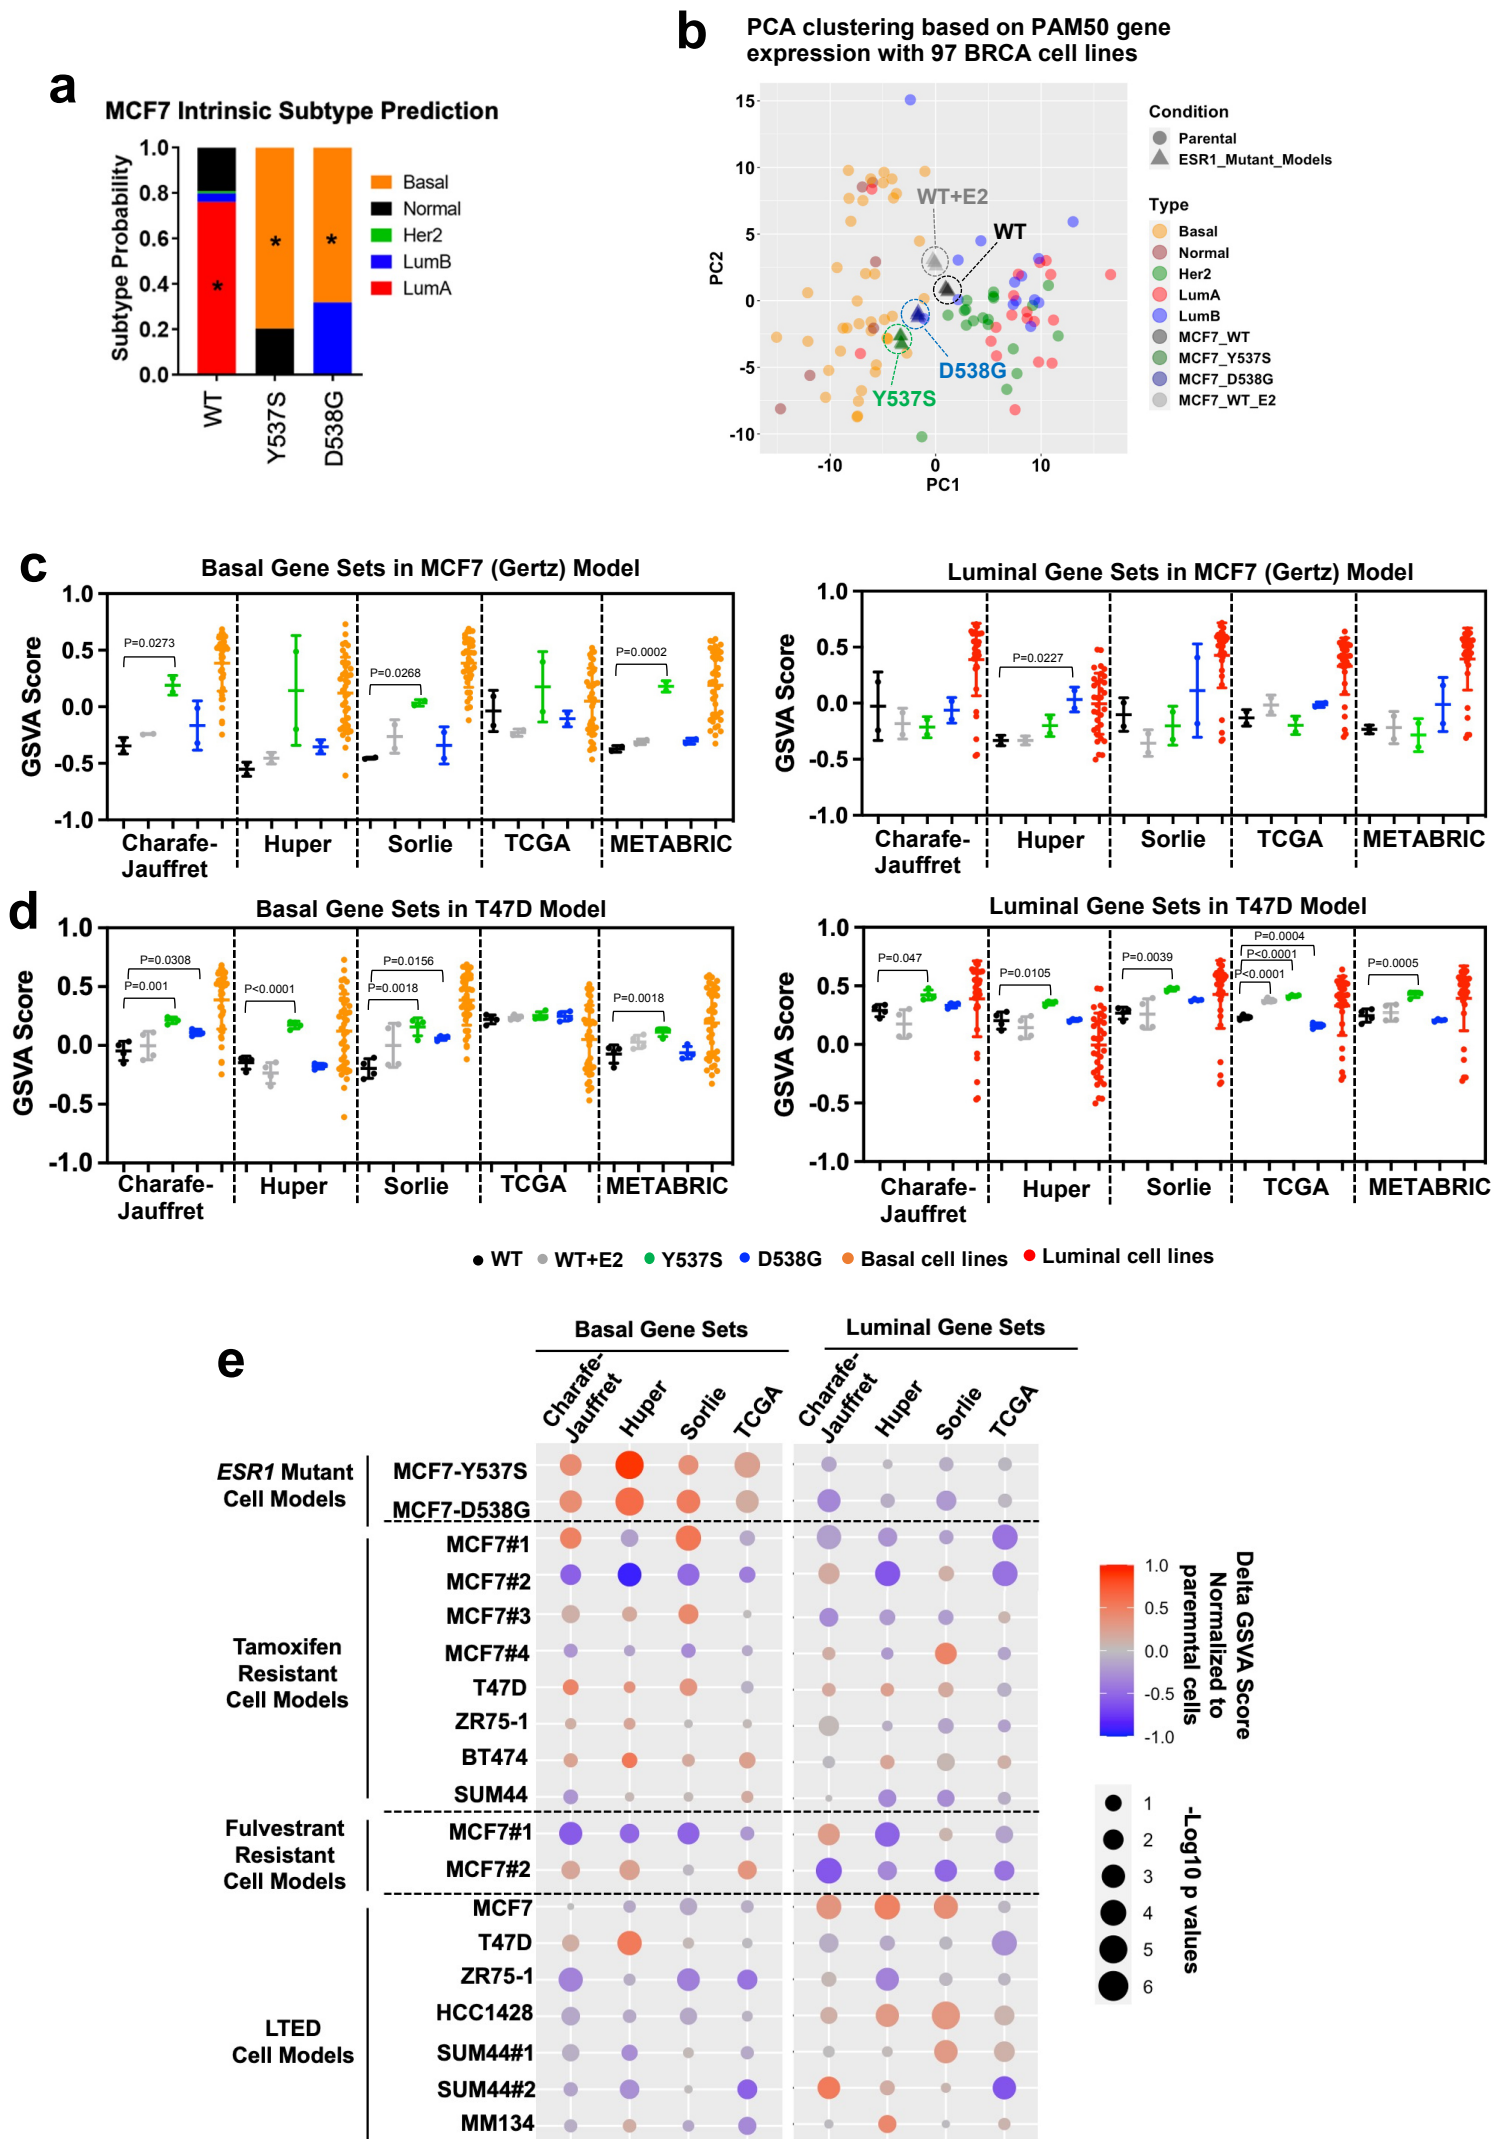

**Supplementary Figure 3. *ESR1* mutant cell models but not other endocrine resistant models show increased basal marker enrichment. (Related to Fig. 1)**

a) Stacked plot shows probability distribution of five breast cancer subtypes in MCF7 *ESR1* WT and mutant cells. The dominant subtype called by geneфу is indicated with asterisk symbols.

b) PCA plot showing the clustering of *ESR1* WT and mutant cells with other 97 characterized breast cancer cell lines.

c) and d) Dot plots showing GSVA score of the five pairs of basal/luminal marker gene sets enrichment in MCF7 (Gertz) (c) and T47D (d) genome-edited *ESR1* mutant cell models. Two individual clones were used as biological replicates for Gertz model, while four biological replicates were used for T47D cell model. Data are presented as mean  $\pm$  SD. Enrichment scores in luminal (n=33) and basal (n=39) breast cancer cell lines were used as positive controls. Dunnett's test (two-sided) was used within each group.

e) Graphic view of delta GSVA enrichment score of 19 different endocrine resistant breast cancer models normalized to their corresponding parental cell counterparts. Color scale represents changes of enrichment scores and dot size shows significance. Data sets were downloaded and analyzed from GEO. (Tamoxifen resistant models: GSE128458, GSE104985, GSE111151, GSE26459 and GSE106681; Fulvestrant resistant models: GSE118713 and GSE104985; LTED models: GSE75971 and GSE116744). Detailed sources information can be found in Supplementary Table 8.

Source data are provided as a Source Data file for a-e.

# Supplementary Figure 4

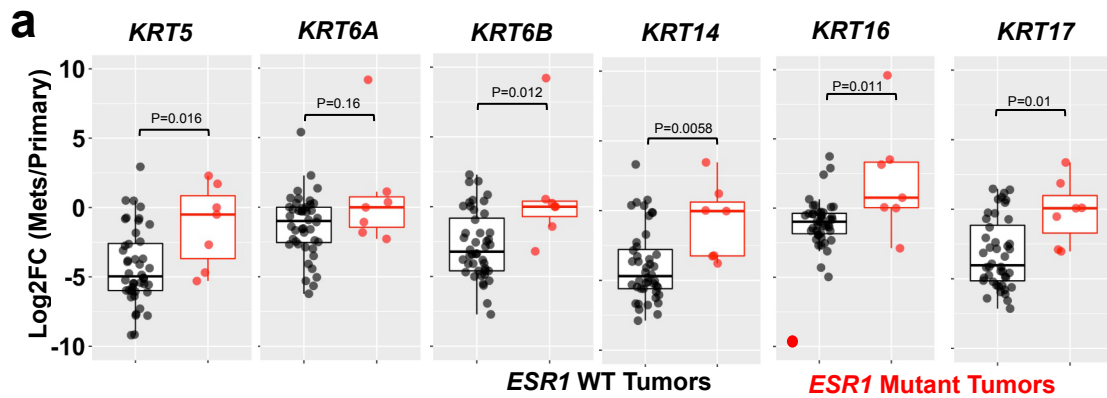

**b** Correlation of BCKs Fold Change in Two genome-edited MCF7 *ESR1* mutant models

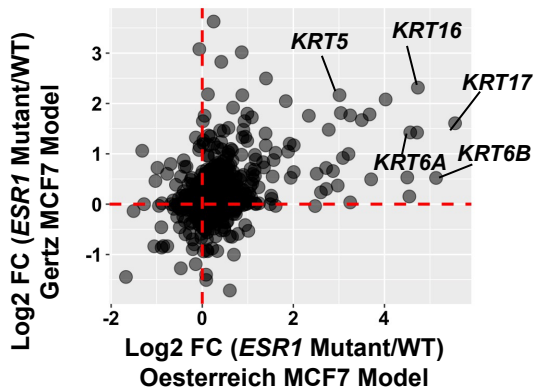

**c** qRT-PCR Validation in Gertz MCF7 *ESR1* Mutant Cell Model

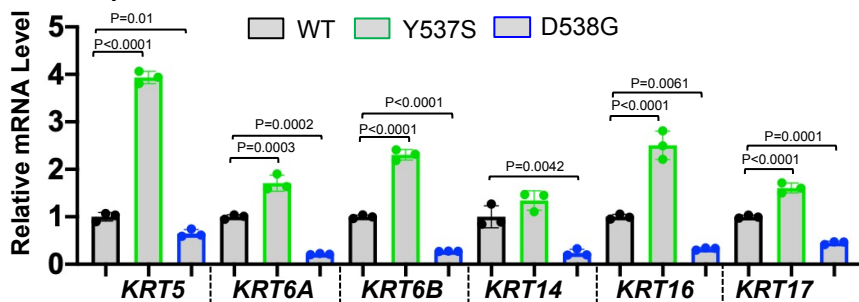

**d** qRT-PCR Validation in Ali MCF7 *ESR1* Mutant Cell Model

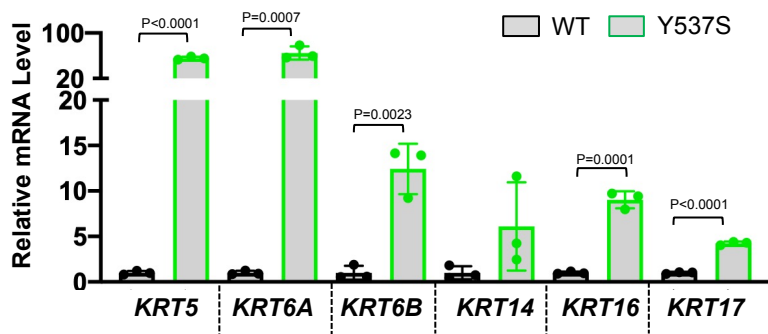

**e** Basal Cytokeratin in T47D *ESR1* Mutant Cell Model

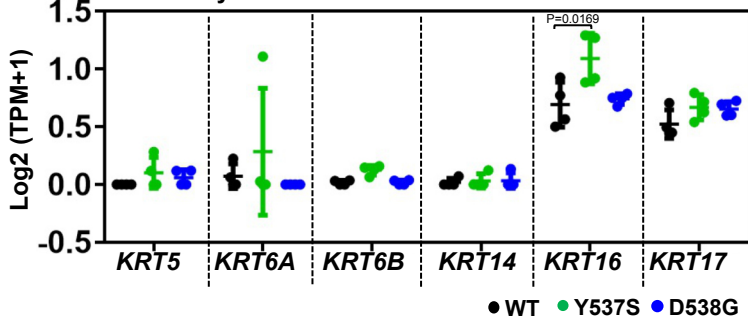

**f**

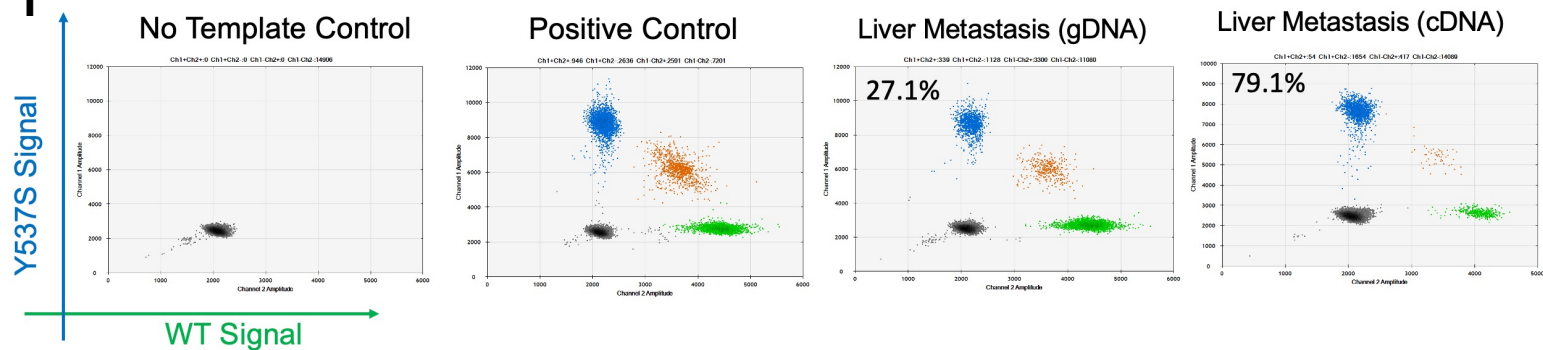

**Supplementary Figure 4. Basal cytokeratins are increased in other genome-edited *ESR1* mutant cell models. (Related to Fig. 2)**

a) Box plots representing the six basal cytokeratin expression in primary-matched paired metastatic tumor samples. Log<sub>2</sub> (CPM+1) values were used for calculation. Expressional fold changes in each metastatic tumor were normalized to the matched primary tumor. Box plots span the upper quartile (upper limit), median (centre) and lower quartile (lower limit). Whiskers extend a maximum of 1.5X IQR. Mann-Whitney U test (two-sided) was performed to compare the expression between *ESR1* WT (N=44) or *ESR1* mutant (N=7) paired tumors. (\* p<0.05; \*\* p<0.01)

b) Two-dimensional plot showing the correlation of basal marker gene fold changes in Oesterreich and Gertz MCF7 genome-edited Y537S/D538G cells (normalized to WT vehicle group). Increased basal cytokeratins were labelled with gene names.

c) and d) Bar graphs representing qRT-PCR measurement of *KRT5/6A/6B/14/16/17* mRNA levels in the Gertz (c) and Ali (d) MCF7 WT and *ESR1* mutant cells.  $\Delta\Delta C_t$  method was used to analyze relative mRNA fold changes normalized to WT cells and *RPLP0* levels were measured as the internal control. Each bar represents mean  $\pm$  SD with three biological replicates. These experiments were done once for each. Dunnett's test (c) (two-sided) and student's t test (d) (two-sided) were used to compare BCKs expression levels between WT and mutants respectively.

e) Dot plot representing all six basal cytokeratins expression in the Oesterreich T47D *ESR1* mutant cell models. Each dots represent the Log<sub>2</sub> (TPM+1) value from the original RNA-seq data set (GSE89888) with n=4 biologically independent replicates. Dunnett's test (two-sided) was applied.

f) Scattered plot representing Y537S mutation identification from droplet digital PCR on the ER+ liver metastasis at DNA and RNA levels. Water and Y537S mutant cell model DNA were used as positive and negative controls.

Source data are provided as a Source Data file for a-e.



# Supplementary Figure 5

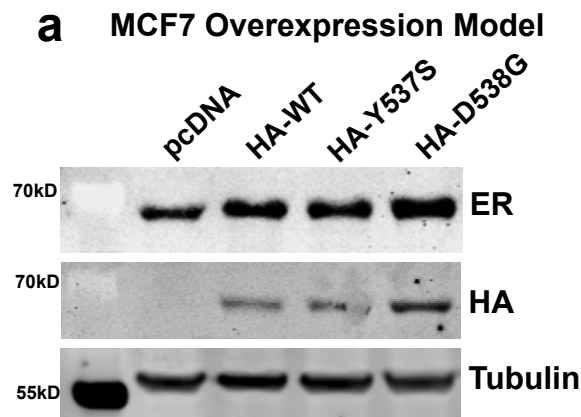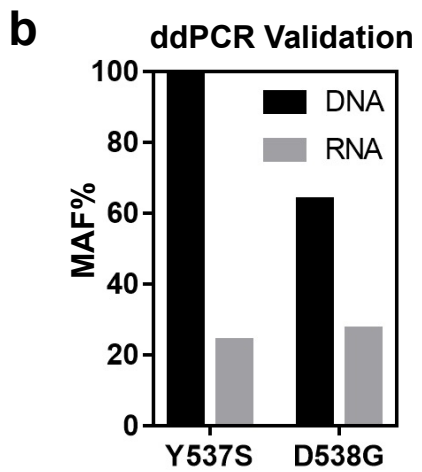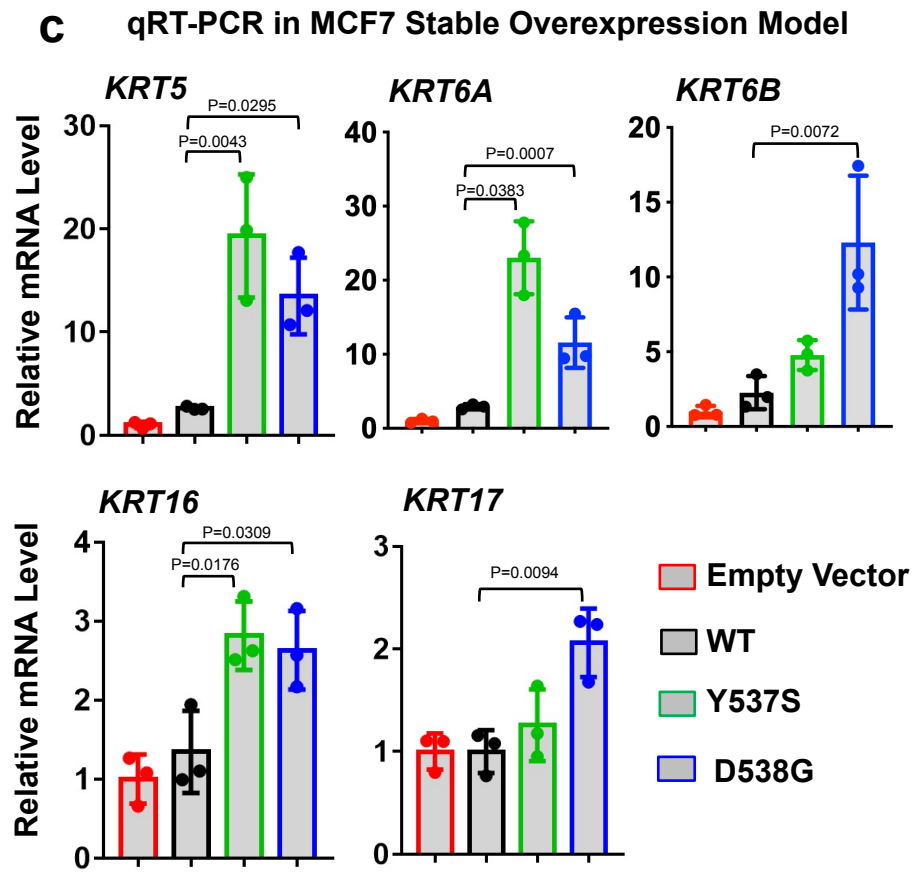

**Supplementary Figure 5. Basal cytokeratins are increased in stably overexpressed *ESR1* mutant cell models. (Related to Fig.2)**

a) Immunoblot validation of MCF7 *ESR1* mutant overexpression cells. Total ER and overexpressed ER (HA-tagged) were detected and tubulin was used as loading control. This experiment was done once. Uncropped images are provided in Supplementary Figure 13.

b) ddPCR validation of mutation allele frequencies in Y537S and D538G overexpression cell model at both DNA (gDNA) and RNA (cDNA) levels. This experiment was done once.

c) Bar graphs representing qRT-PCR measurement of *KRT5/6A/6B/16/17* mRNA levels in MCF7 overexpression *ESR1* mutant cell models.  $\Delta\Delta C_t$  method was used to analyze relative mRNA fold changes normalized to empty vector cells and *RPLP0* levels were measured as the internal control. Each bar represents mean  $\pm$  SD with three biological replicates. Data were from one representative experiment of two independent repeats. Dunnett's test (two-sided) was used to compare the gene expression of each *ESR1* mutant group to WT cells.

Source data are provided as a Source Data file for b,c.

# Supplementary Figure 6

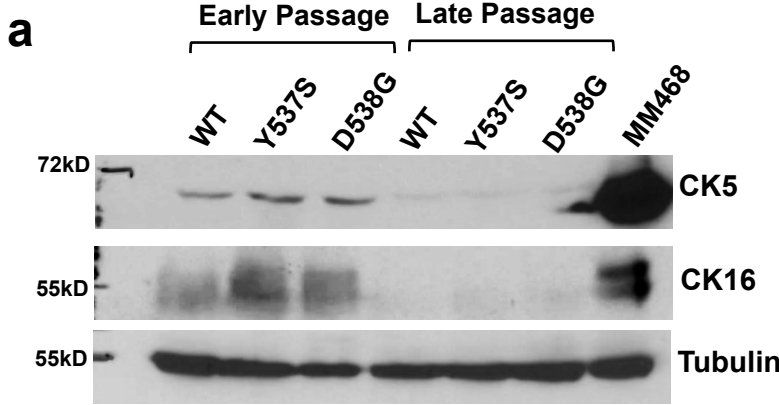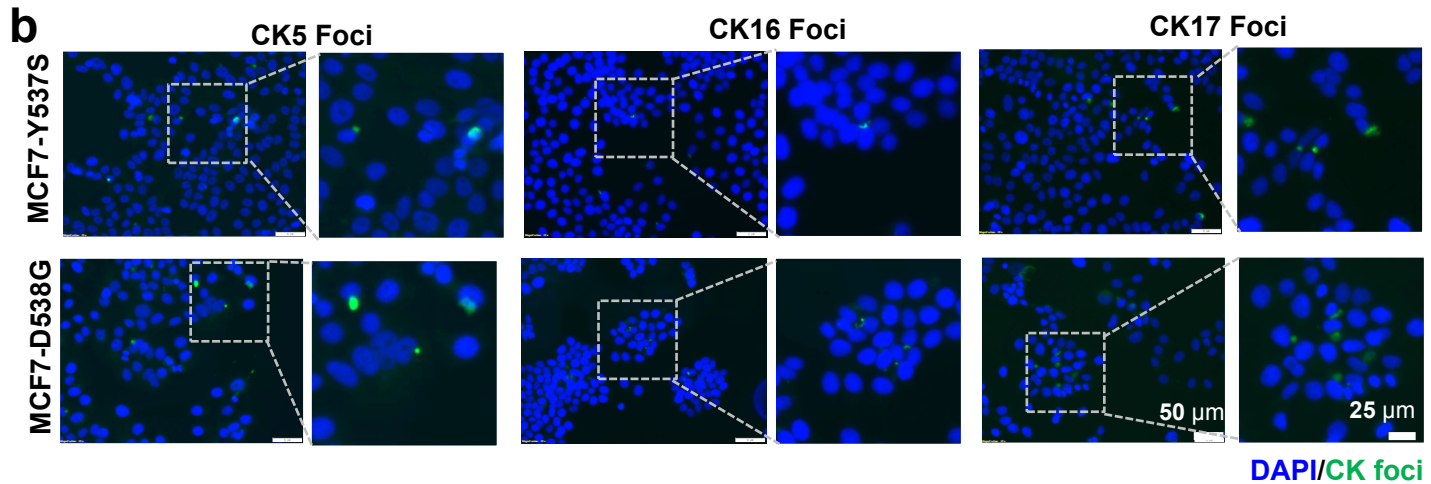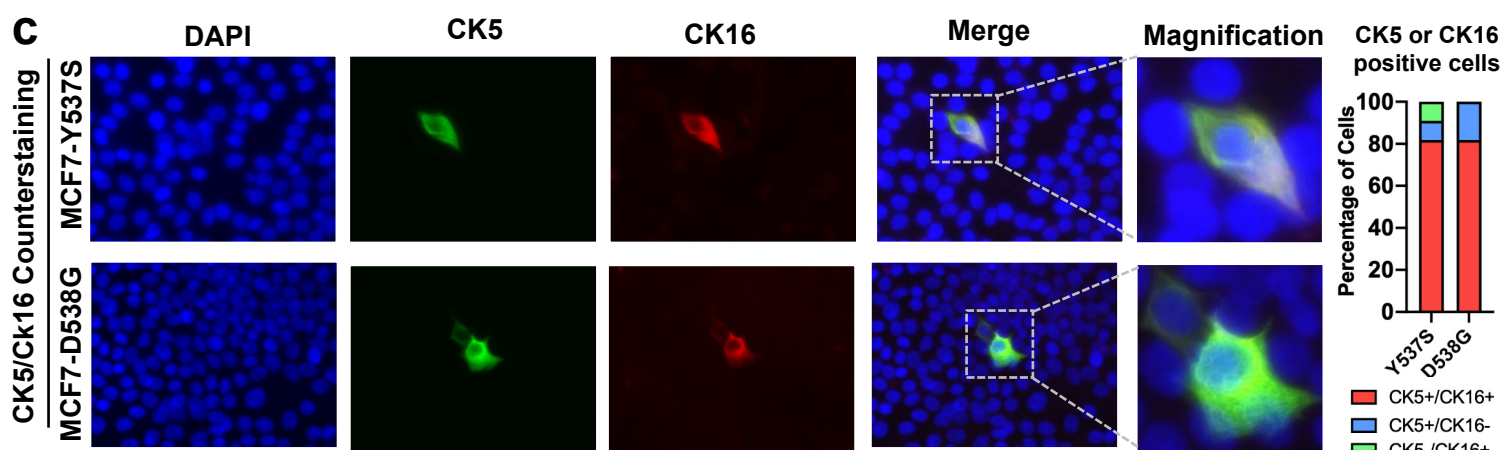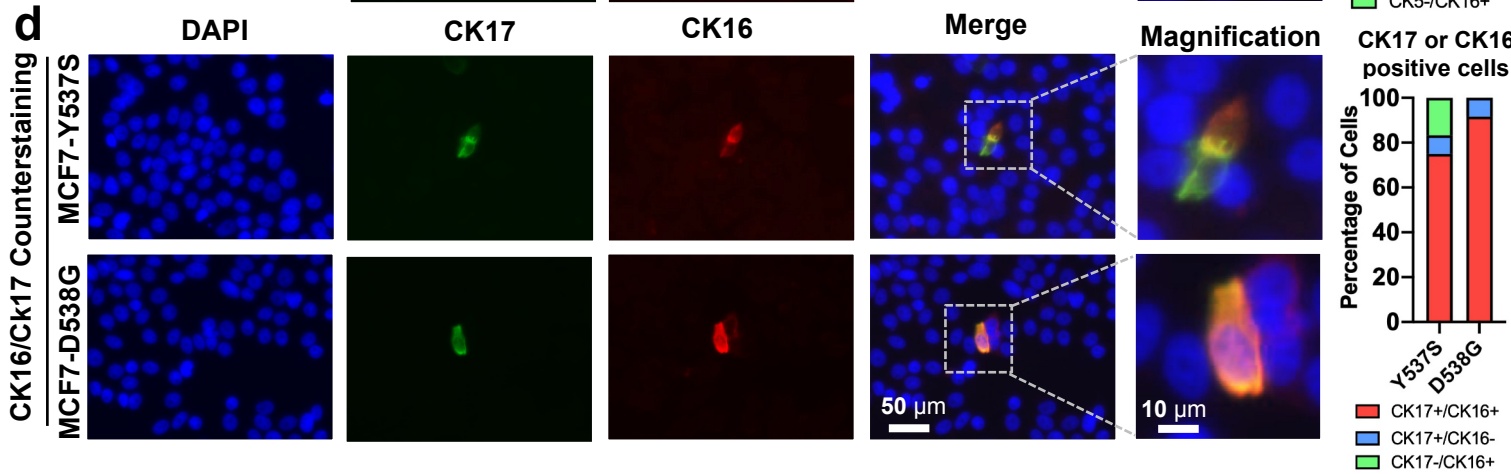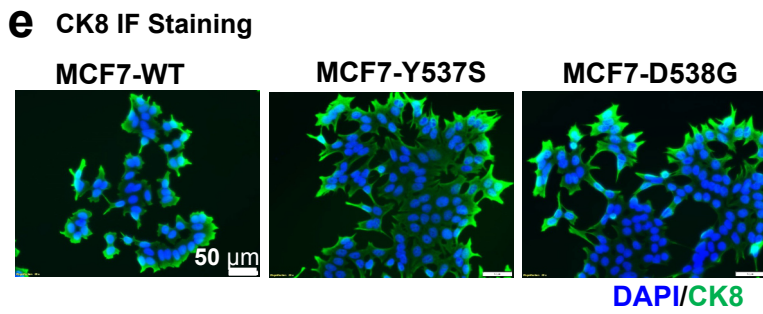

**Supplementary Figure 6. Basal cytokeatins are heterogeneously expressed in *ESR1* mutant cells. (Related to Figure 2)**

a) Immunoblot validation of CK5 and CK16 expression MCF7 *ESR1* mutant cells in low (P6-P8) and high (P30-P32) passages. Tubulin was used as loading control. This experiment was done once. Uncropped images are provided in Supplementary Figure 13.

b) Representative images of CK5/16/17 foci in MCF7 *ESR1* mutant cells. Images were taken under 20x magnification. Specific regions with foci detected were further zoomed in as magnified views. Data were from one representative of three independent replicates.

c) and d) Left panel: Representative images of CK5/CK16 (c) and CK5/CK17 (d) counterstaining in MCF7 *ESR1* mutant cells. Images were taken under 20x magnification. Specific regions with CK+ cells were further zoomed in as magnified views. Right panel: Stacked plots representing the quantification of percentage of cells with double CK subtype positivity (red) or single CK subtype positivity (blue/green) among all CK+ cells (n=11 for CK5/CK16 co-staining quantification, n=12 for CK16/CK17 co-staining quantification). This experiment was done once.

e) Representative images of luminal cytokeratin CK8 staining in MCF7 WT and *ESR1* mutant cells. Images were taken under 20x magnification. This experiment was done once.

Source data are provided as a Source Data file for c,d.

# Supplementary Figure 7

## a Differential binding intensity analysis

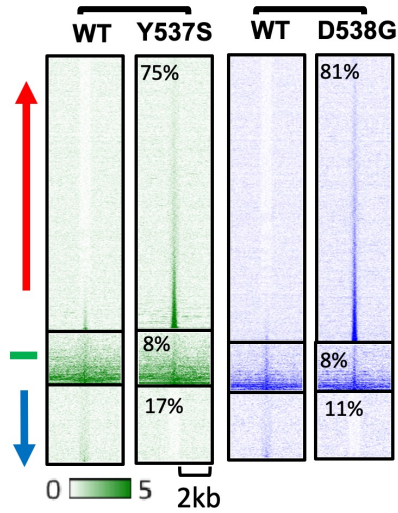

## c ER Binding Site Overlap

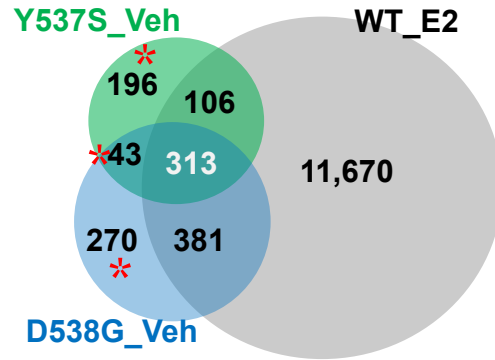

## b

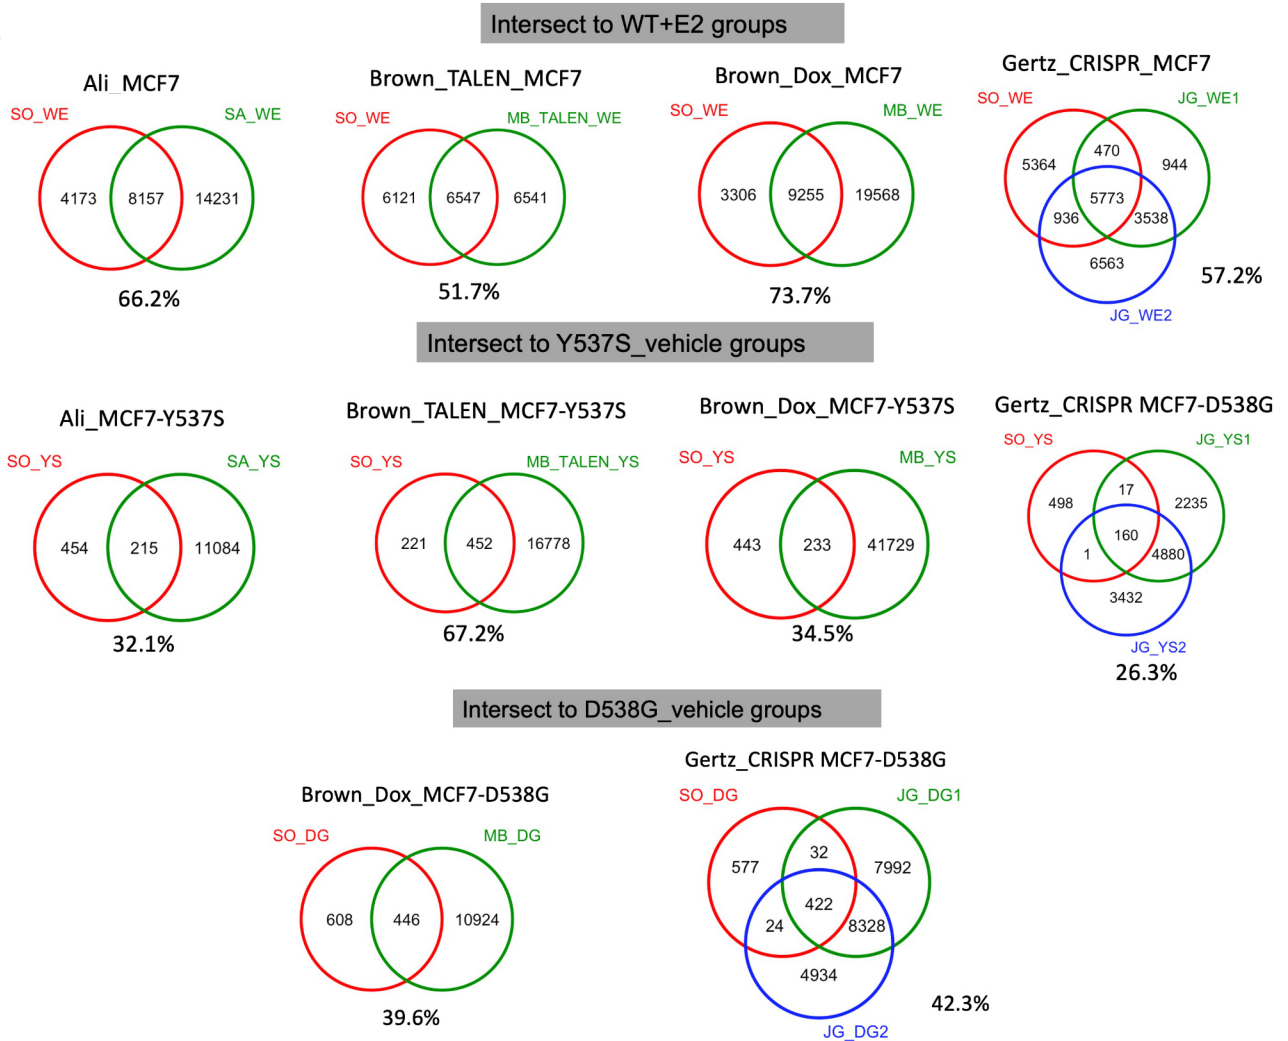

# Supplementary Figure 7-Continued

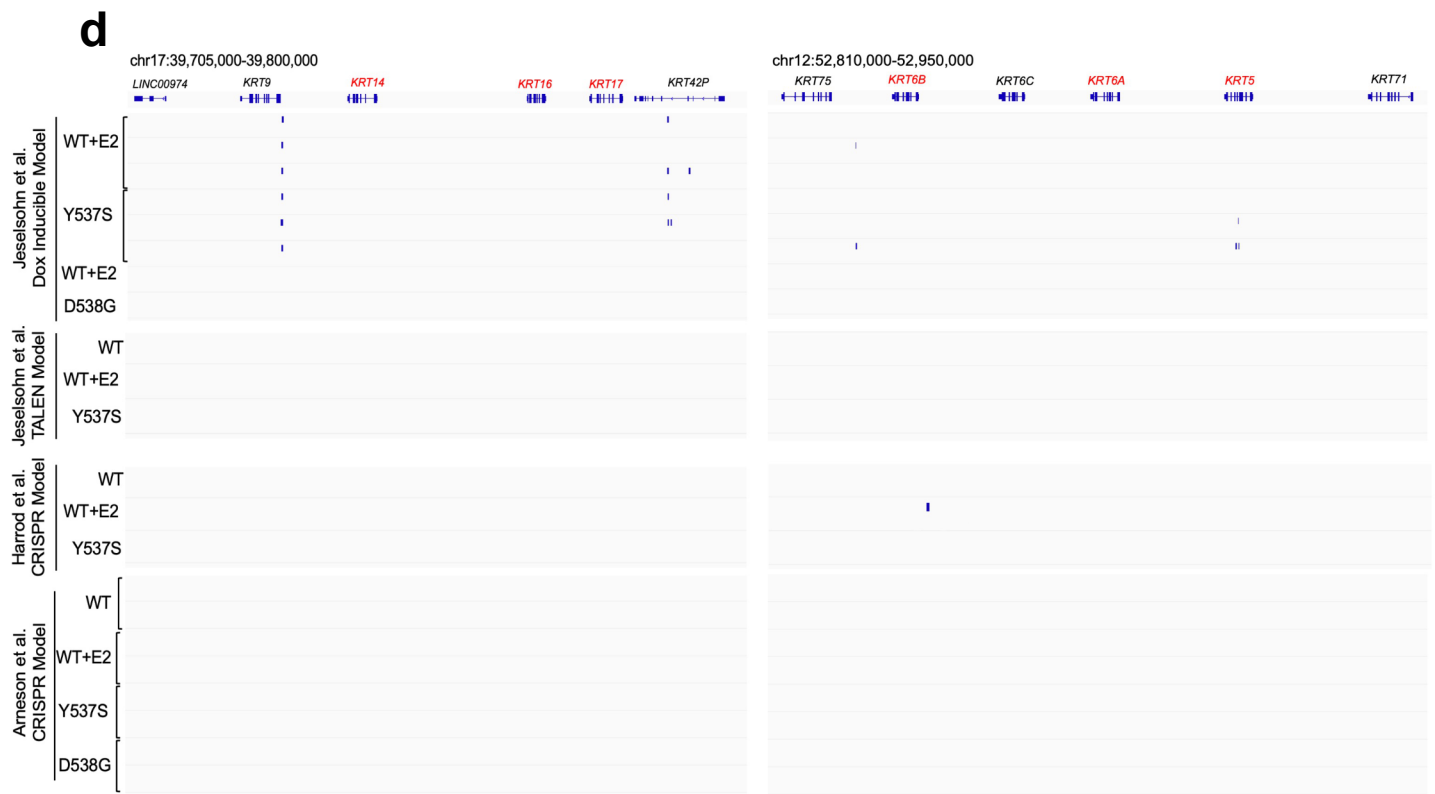

**e** Correlation of E2 and *ESR1* mutation-induced FC of basal marker union

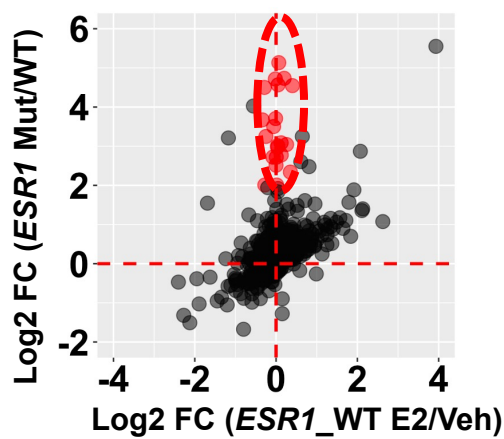

**f**

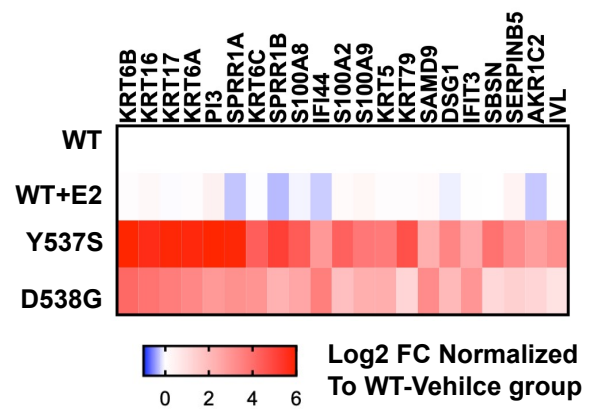

**g** Intersection of ChIP-seq annotated genes with basal marker union

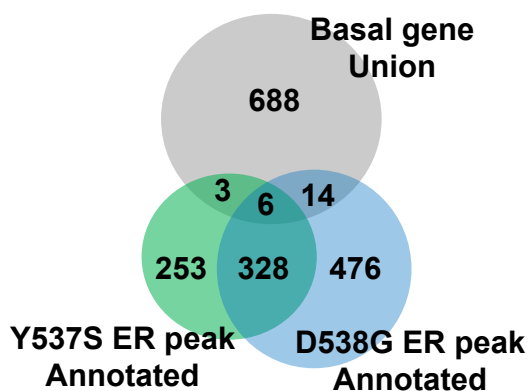

**h** Basal marker genes annotated by ER ChIP-seq

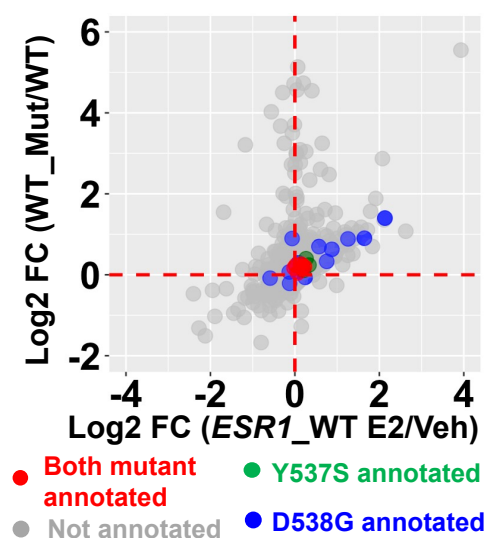

**Supplementary Figure 7. ChIP-seq profiling of mutant ER cistrome reveals limited regulation on basal marker gene from ER genomic binding. (Related to Fig.3)**

- a) Heatmaps of differential ER binding intensities in Y537S, D538G mutants compared to WT ER in a pairwise manner, shown in a horizontal window of  $\pm 2$  kb from the peak center. The pairwise comparison between WT and mutant samples were performed to calculate the fold change (FC) of intensities and the binding sites were sub-classified into sites with increased intensity ( $FC > 2$ , red arrow), decreased intensity ( $FC < -2$ , blue arrow), and non-changed intensity ( $-0.2 < FC < 0.2$ , green line). Percentage of each subgroups were labelled on the heatmaps respectively.
- b) Venn diagrams representing the intersection of ER ChIP-seq used in the study to other three independent data sets from Harrod et al. (Ali model, GSE78286), Jeselsohn et al. (Brown model, GSE94493) and Arneson et al. (Gertz model, GSE148279) ChIP-seq profile from the three different conditions were analyzed including *ESR1* WT+E2, Y537S and D538G mutant cells. Peak overlapping percentages of ChIP-seq from this study were indicated below each diagram.
- c) Venn Diagrams showing the occupancy intersection between WT-E2, Y537S-vehicle and D538G-vehicle groups in MCF7 cell model. *De novo* mutant ER peaks were labelled with asterisk symbols.
- d) Genomic track showing called ER binding peaks at KRT14/16/17 (left panel) and KRT5/6A/6B (right panel) loci from four different ER ChIP-seq data sets of MCF7 *ESR1* mutant cells from Harrod et al. (Ali model, GSE78286), Jeselsohn et al. (Brown model, GSE94493) and Arneson et al. (Gertz model, GSE148279).
- e) Scattered plot showing the correlation of basal gene fold changes of MCF7 *ESR1* mutant (average FC of Y537S and D538G) cells and E2 stimulation in WT cells. 21 skewed basal genes were highlighted in red ( $\text{Log}_2FC > |2|$  in mutants and  $< |0.5|$  in WT-E2 group).
- f) Heatmap representing the fold changes of the 21 unique *ESR1* mutant-regulated basal genes (highlighted in Figure 7C) in WT-E2 and two mutant groups normalized to WT-vehicle group using RNA-seq data (GSE89888).
- g) Venn digram showing interaction of Y537S (n=577) and D538G (n=778) ER peak annotated genes to the union of basal genes (n=711) collection. Annotated genes were called within  $\pm 50$  kb range of each ER peak.

h) Scattered plot showing the correlation of basal marker gene fold changes of MCF7 *ESR1* mutant (average FC of Y537S and D538G) cells and E2 stimulation in WT cells. Genes that were annotated by ER ChIP-seq data in Y537S (green), D538G (blue) and both mutants (red) were labelled accordingly. Source data are provided as a Source Data file for e,f,h.



# Supplementary Figure 8

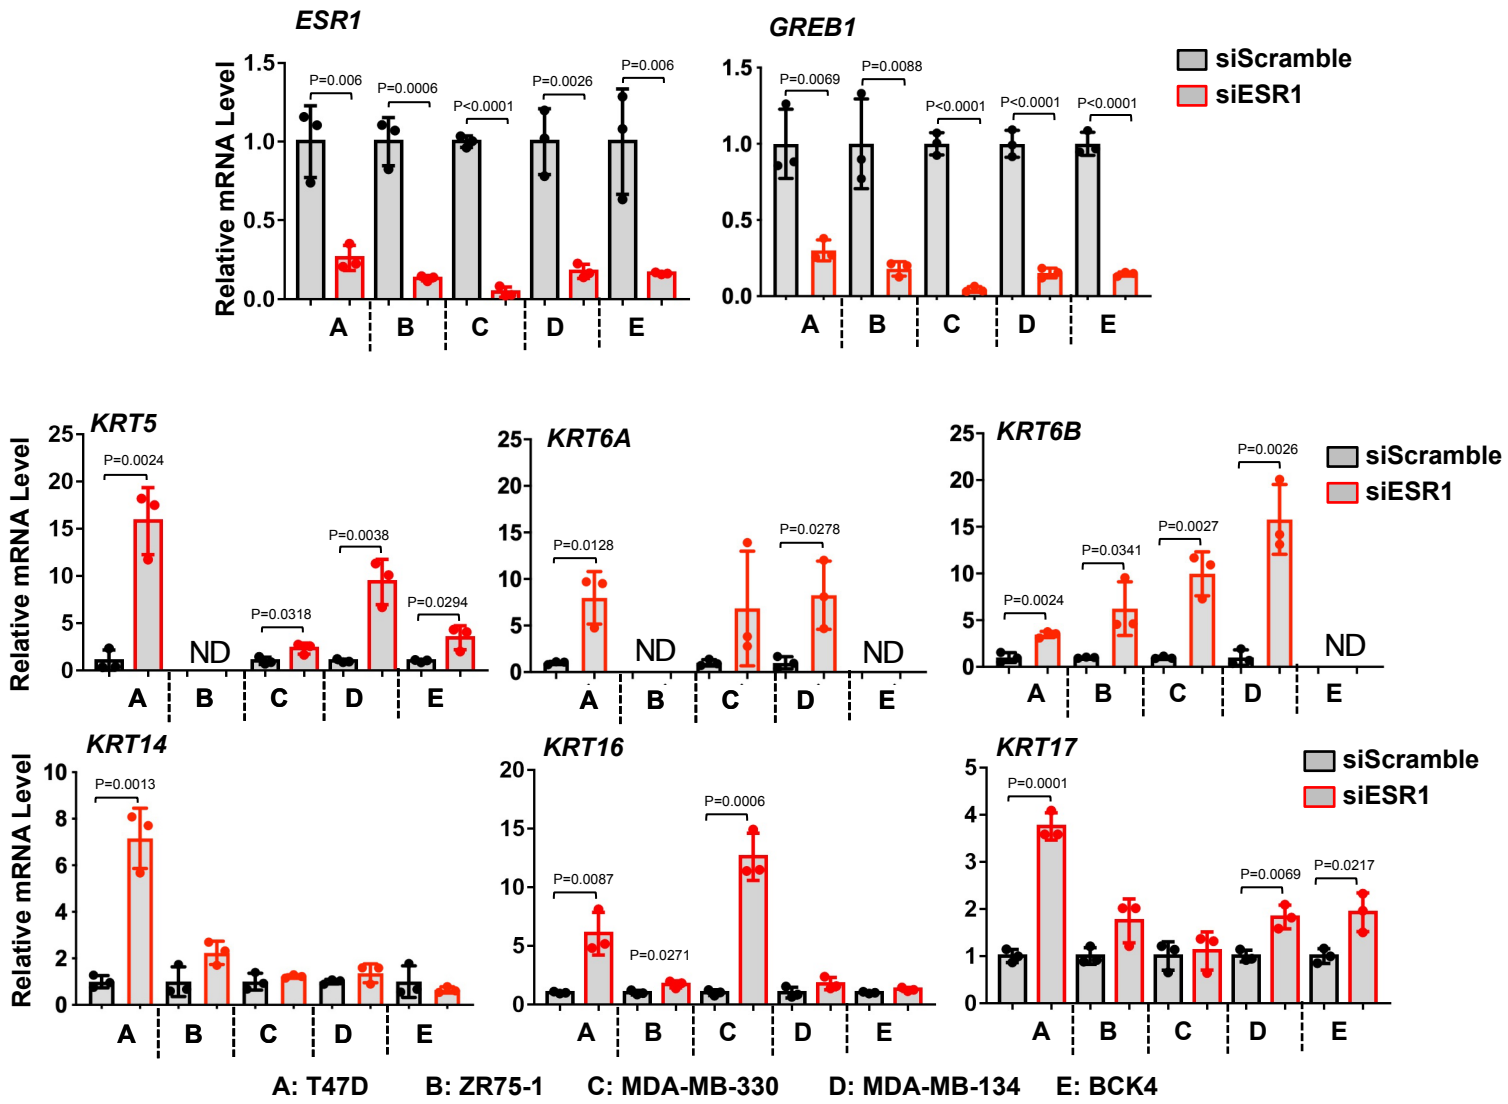

**Supplementary Figure 8. Knockdown of *ESR1* generally increased basal cytokeratin expression in ER+ breast cancer cell lines. (Related to Fig. 3)**

Bar graphs representing qRT-PCR measurement of *ESR1*, *GREB1* and *KRT5/6A/6B/14/16/17* mRNA levels in five ER+ breast cancer cells with siRNA knockdown of *ESR1* for 7 days.  $\Delta\Delta\text{Ct}$  method was used to analyze relative mRNA fold changes normalized to each siScramble groups and *RPLP0* levels were measured as the internal control. Each bar represents mean  $\pm$  SD with three biological replicates. Student's test (two-sided) was used to compare the gene expression between scramble and knockdown groups. This experiment was done once. Genes with undetectable values were indicated as ND.

Source data are provided as a Source Data file.

# Supplementary Figure 9

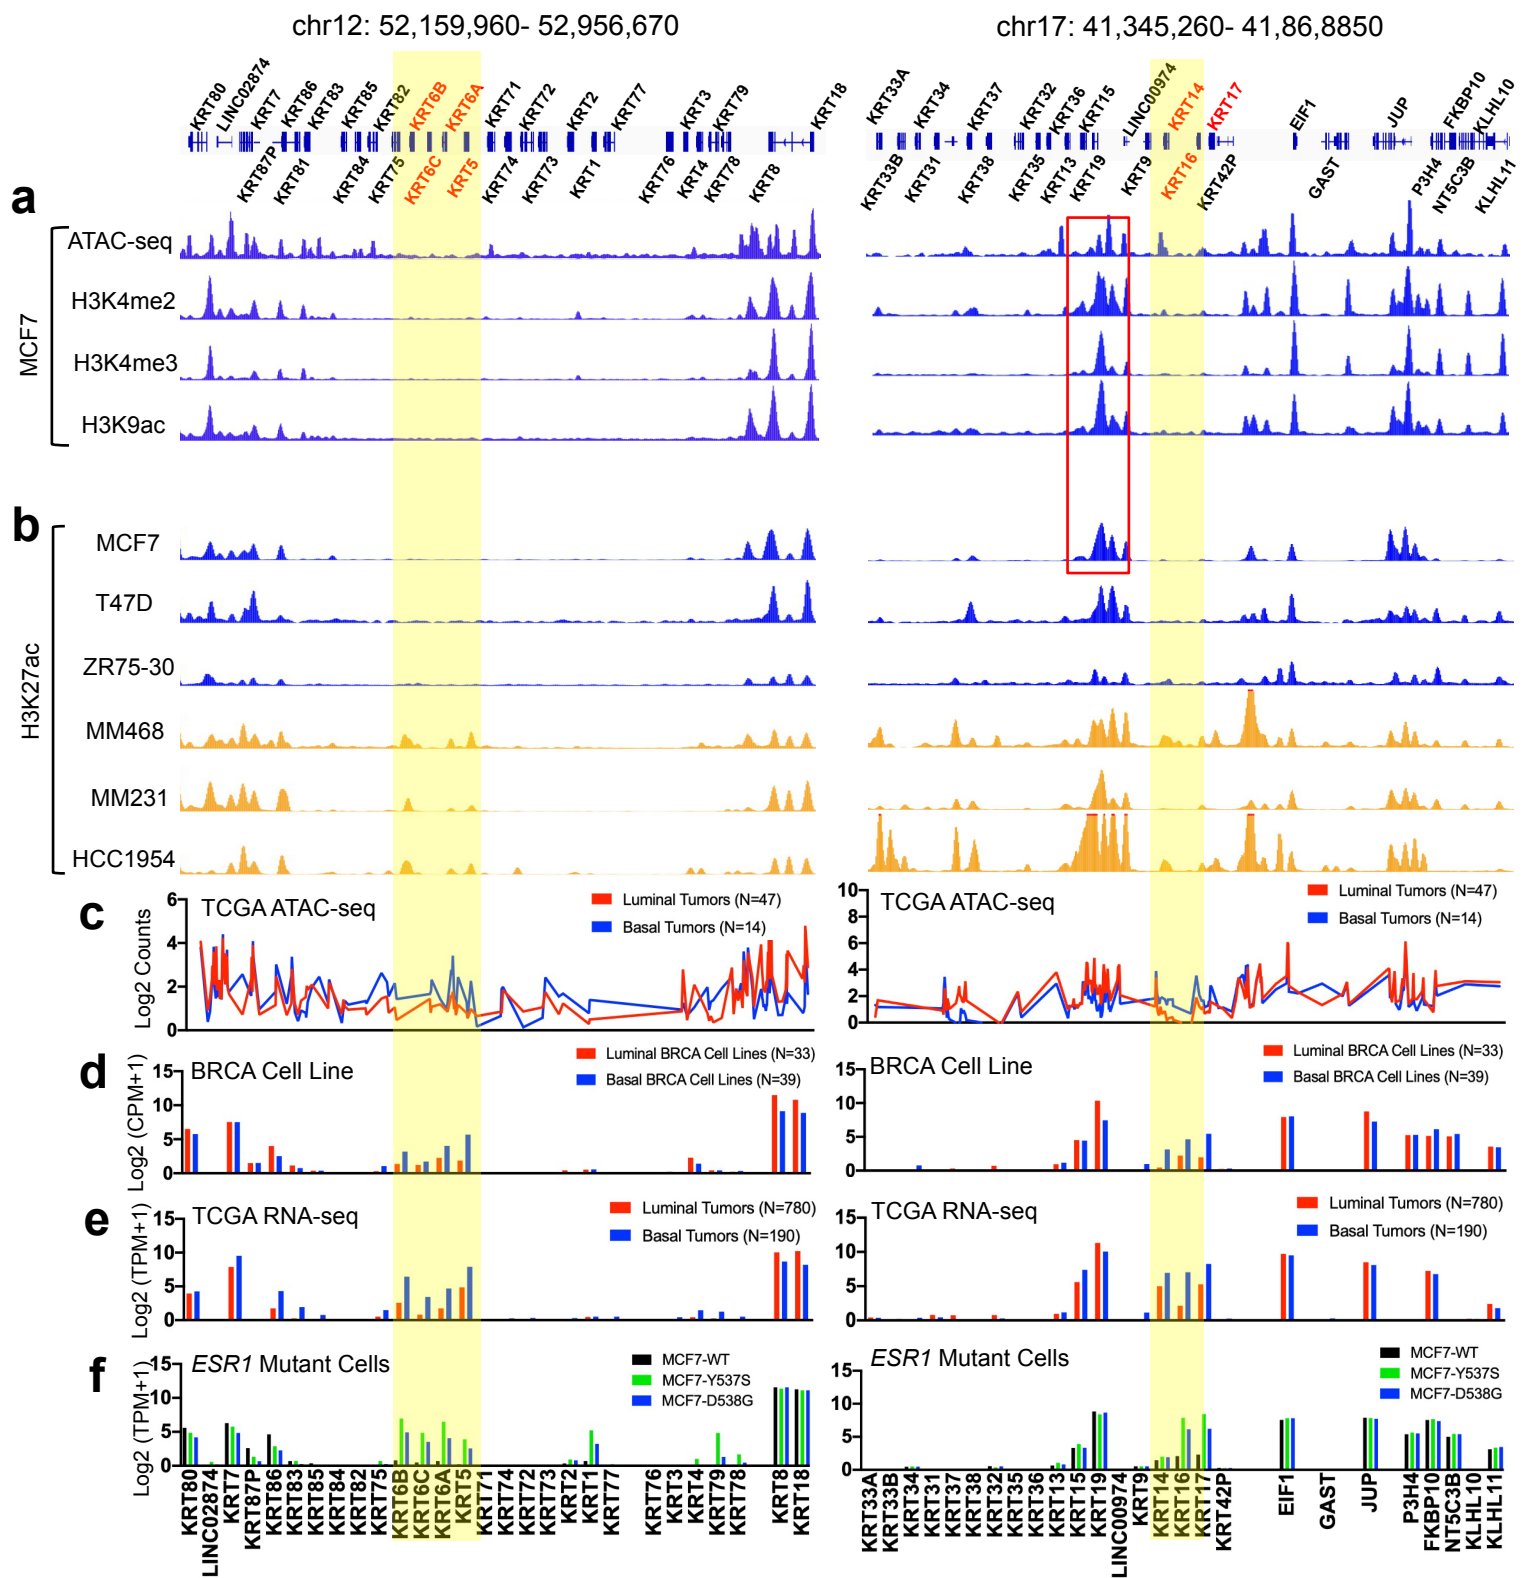

**Supplementary Figure 9. Epigenetic landscapes of *KRT5/6A/6B* and *KRT14/16/17* loci in basal and luminal cells and tumors. (Related to Fig. 4)**

Genomic track illustrations of *KRT5/6A/6B* and *KRT14/16/17* proximal regions with active histone modifications ChIP-seq (a) in MCF7 and H3K27 acetylation ChIP-seq in 3 luminal and 3 basal breast cancer cell lines (b). Data sets were visualized at WashU Genome Browser based on publicly available data sets from GEO (GSE102441, GSE69112, GSE65201 and GSE29069) and ENCODE (ENCSR875KOJ, ENCSR958MIB, ENCSR056UBA and ENCSR752UOD). Y axis represents the signal intensity of ChIP-seq data sets. TCGA ATAC-seq (c) and RNA-seq log<sub>2</sub> (TPM+1) values (e) were compared between luminal and basal tumors with specific numbers labelled in the plots. In addition, proximal gene expressions were compared in 33 luminal and 39 basal breast cancer cell lines (d) and MCF7 *ESR1* mutant cell models (f) using Log<sub>2</sub> (CPM+1) and Log<sub>2</sub> (TPM+1) values respectively based on RNA-seq data. *KRT5/6A/6B* and *KRT14/16/17* loci were highlighted in light yellow. The super enhancer region featured by active histone modification at *KRT14/16/17* loci was highlighted in a red frame.

Source data are provided as a Source Data file for c-f.

# Supplementary Figure 10

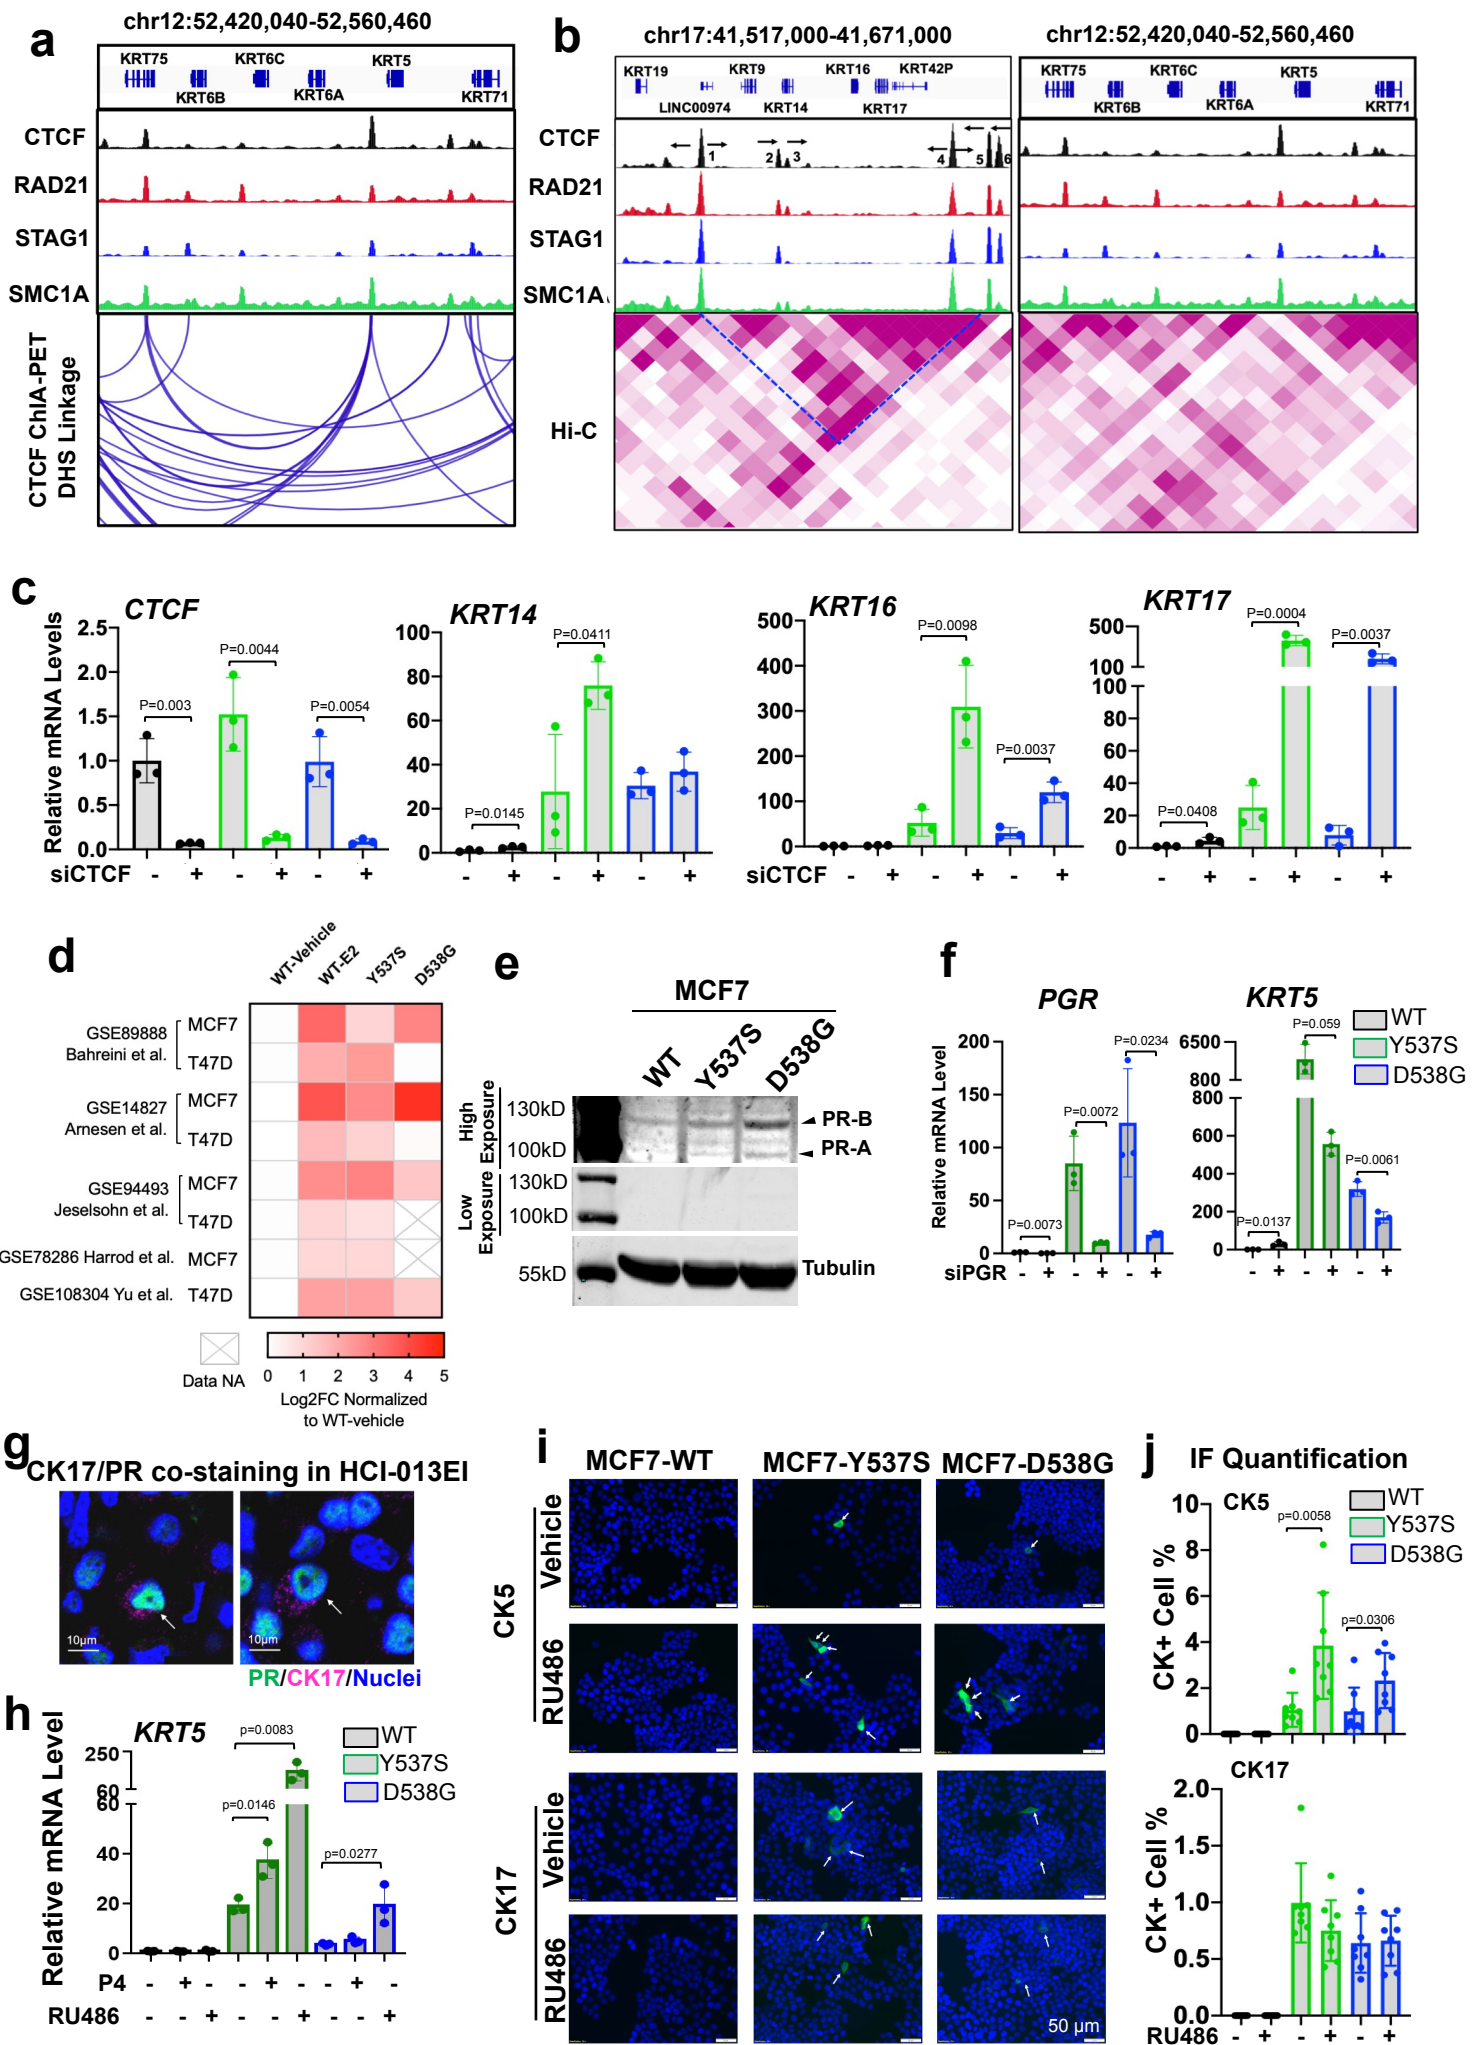

**Supplementary Figure 10. BCKs are associated with a progesterone receptor binding enhancer orchestrated TAD in *ESR1* mutant cells. (Related to Fig.4)**

a) Upper panel: Genomic track illustrating the CTCF/cohesion complex binding at *KRT5/6A/6B* proximal genomic region in MCF7 cells. CTCF and RAD21 ChIP-seq were downloaded from ENCODE (ENCSR560BUE and ENCSR703TNG). STAG1 and SMC1A ChIP-seq data were from GEO (GSE25021 and GSE76893). Y-axis represents signal intensity of each track. Include genomic coordinates. Lower panel: CTCF-driven chromatin loops visualized using a CTCF ChIA-PET data set in MCF7 cells (GSE72816) at the 3D Genome Browser platform. Each linkage represents a chromatin loop.

b) Genomic track illustrating CTCF/Cohesin complex binding and heatmap presentation of chromatin interaction scores at *KRT14/16/17* and *KRT5/6A/6B* loci using a MCF7 Hi-C data set (GSE130916). Each bin represents a 10kb window. The interaction between CTCF peak#1 and #5 at *KRT14/16/17* loci was highlighted with a blue frame.

c) Bar graphs showing qRT-PCR measurement of *CTCF*, *KRT14*, *16* and *17* mRNA levels in MCF7 *ESR1* WT and mutant cells with siRNA knockdown of *CTCF* for 7 days.  $\Delta\Delta C_t$  method was used to analyze relative mRNA fold changes normalized to WT cells (siScramble group) and *RPLP0* levels were measured as the internal control. Each bar represents mean  $\pm$  SD with three biological replicates. Student's test (two-sided) was used to compare the gene expression between scramble and knockdown groups. This experiment was done once.

d) Heatmap representing *PGR* gene expression fold change in WT+E2 and *ESR1* mutant groups from eight different *ESR1* mutant cell models with publicly available RNA-seq data sets.

e) Immunoblot detection PR in MCF7 *ESR1* mutant cells. Tubulin was used as a loading control. This experiment was done once. Uncropped images are provided in Supplementary Figure 13.

f) Bar graphs showing qRT-PCR measurement *PGR* and *KRT5* mRNA levels in MCF7 *ESR1* WT and mutant cells with siRNA knockdown of *PGR* for 7 days. Method was the same as described in c. Data is from one representative of three independent replicates. Student's test (two-sided) was used.

g) Representative images of CK17 and PR counter staining in *ESR1* mutant PDX model HCI-013EI. Images were taken under 20x magnification. This experiment was done once.

h) Bar graphs showing qRT-PCR measurement *KRT5* mRNA levels in MCF7 *ESR1* WT and mutant cells with 0.1% EtOH, 100 nM P4 and 1  $\mu$ M RU486 treatment for 3 days. Method was the same as described in c. Data is from one representative of three independent replicates. Student's test (two-sided) was used

i) Representative images of immunofluorescence staining on CK5 and CK17 in MCF7 WT and *ESR1* mutant cells under 1  $\mu$ M RU486 treatment for 3 days. Images were taken under 20x magnification. CK+ cells are pointed with white arrows.

j) Bar plots quantifying the percentages of CK positive cells of each group. Each bar represents mean  $\pm$  SD from eight different regions combining from two independent experiments. Student's t test (two-sided) was used to compare BCKs positive cell percentage in the presence and absence of the treatment.

Source data are provided as a Source Data file for c,d,f,h,j.

# Supplementary Figure 11

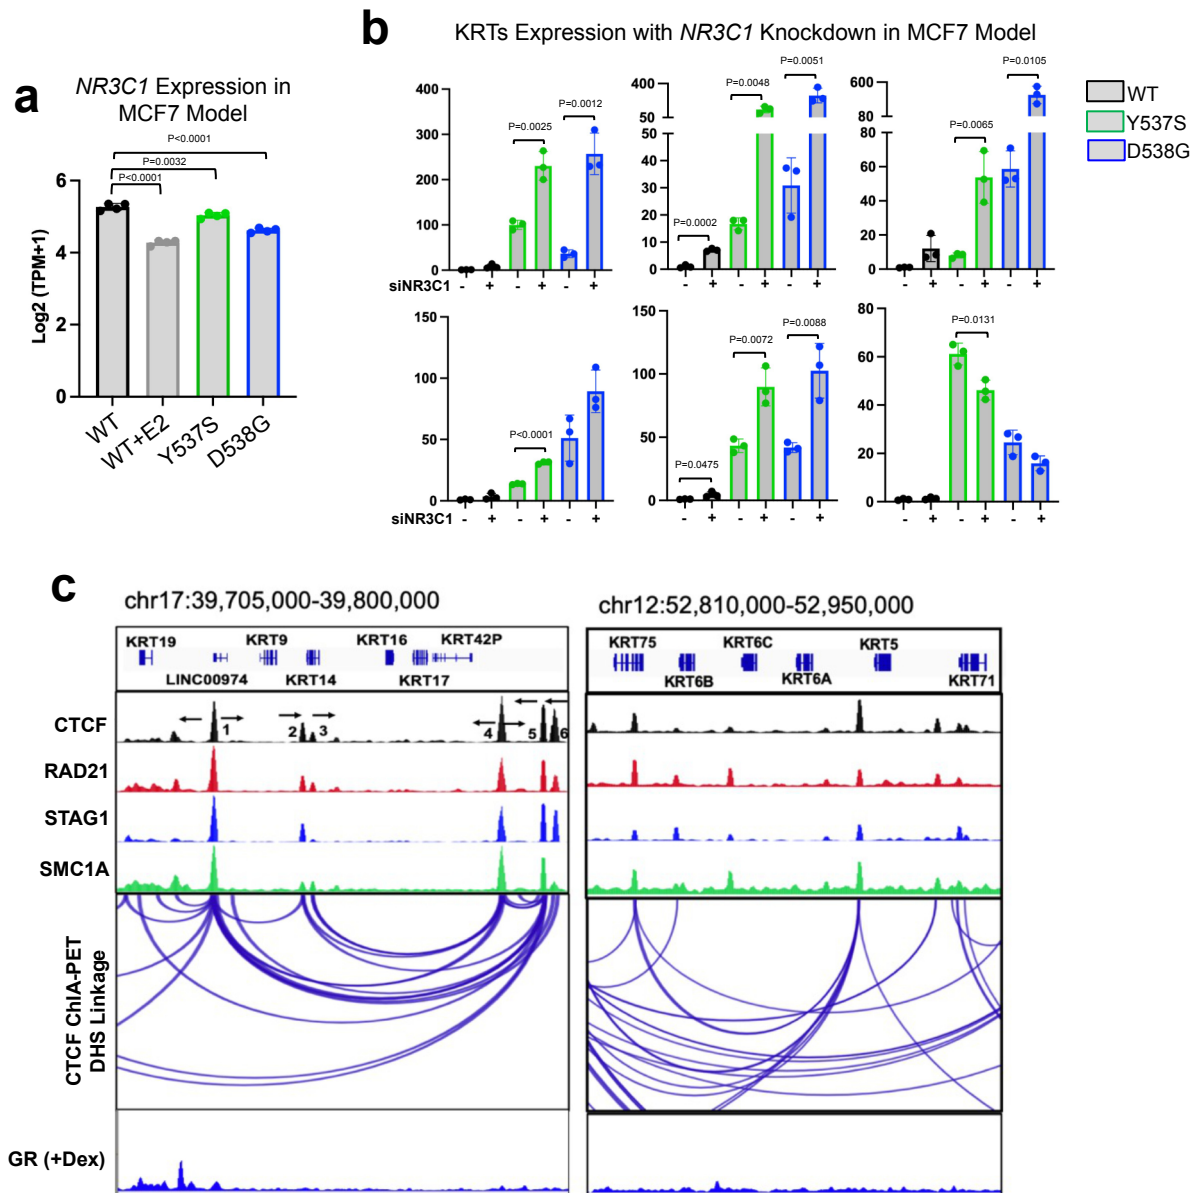



**Supplementary Fig. 11. Glucocorticoid receptor is a suppressor of BCK expression in *ESR1* mutant cells. (Related to Fig.4)**

a) Bar plot showing expression of *NR3C1* in MCF7 *ESR1* WT and mutant cells. Data were extracted from RNA-seq using  $\log_2(\text{TPM}+1)$  values with four biological replicates. Dunnett's test (two-sided) was used to compare each group versus WT vehicle group.

b) qRT-PCR measurement of *ESR1*, *KRT5/6A/6B/14/16/17* mRNA levels in MCF7 WT and *ESR1* mutant cells with NR3C1siRNA knockdown for 7 days. mRNA fold change normalized to WT cells; RPLP0 levels were measured as internal control. Each bar represents mean  $\pm$  SD with three biological replicates. Data shown are representative from three independent experiments. Student's t-test (two-sided) was used to compare the gene expression between scramble and knockdown groups.

c) Genomic track illustrating the CTCF/Cohesion complex binding at *KRT14/16/17* and *KRT5/6A/6B* proximal genomic region in MCF7 cells. CTCF and RAD21 ChIP-seq were downloaded from ENCODE. STAG1 and SMC1A ChIP-seq data were from GEO (GSE25021 and GSE76893). GR ChIP-seq with dexamethasone treatment was downloaded from GSE72249. Y-axis represents signal intensity of each track. Source data are provided as a Source Data file for a,b.

# Supplementary Figure 12

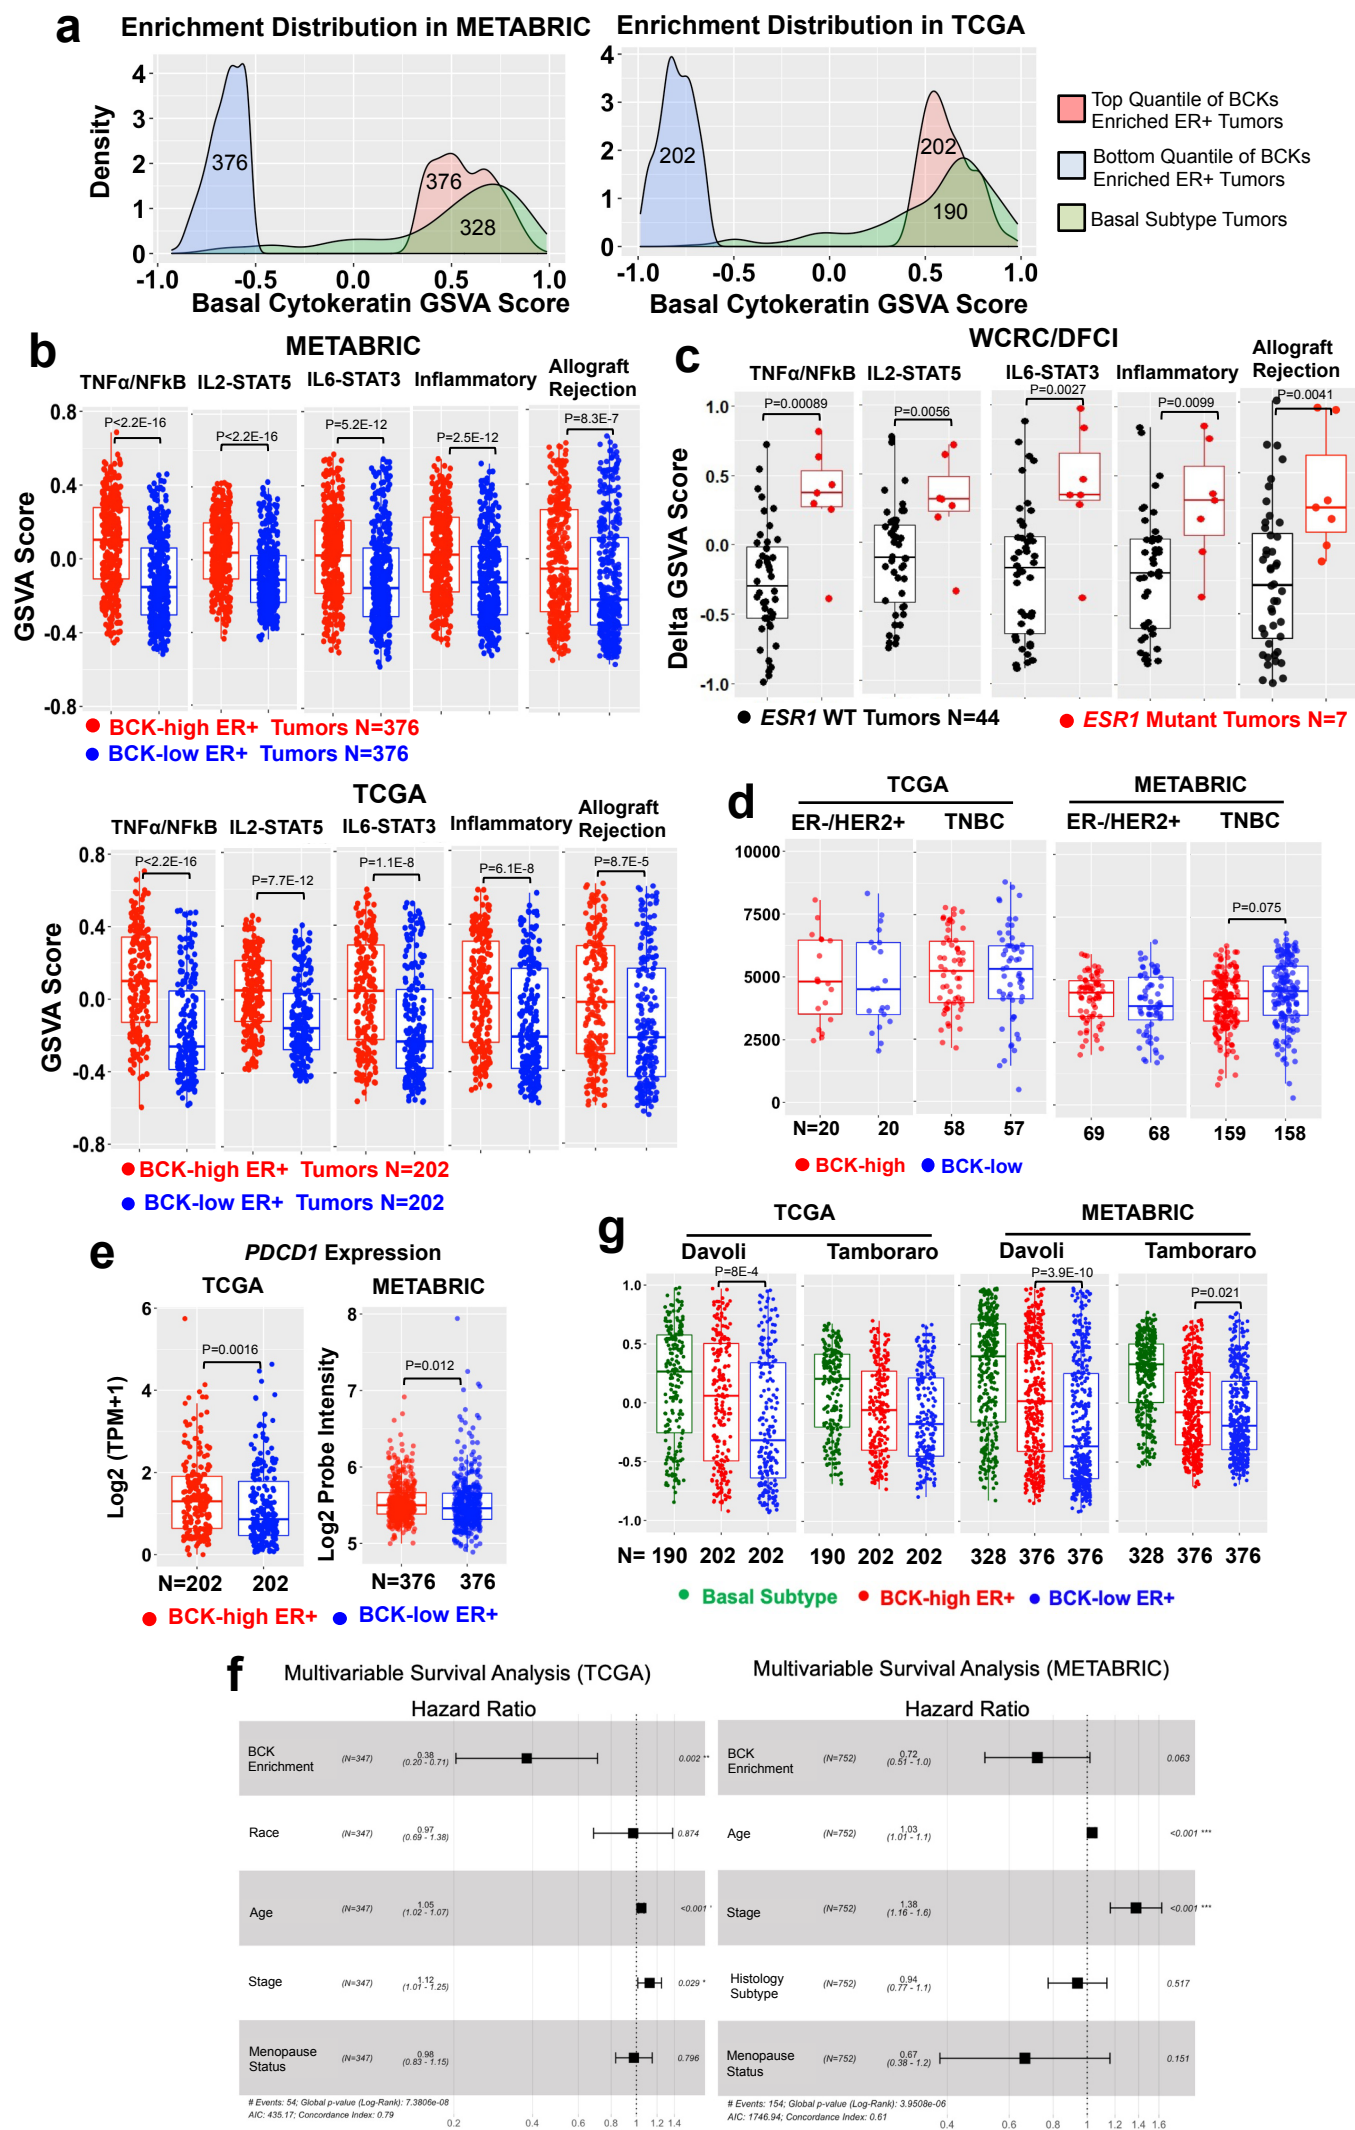

# Supplementary Figure 12-Continued

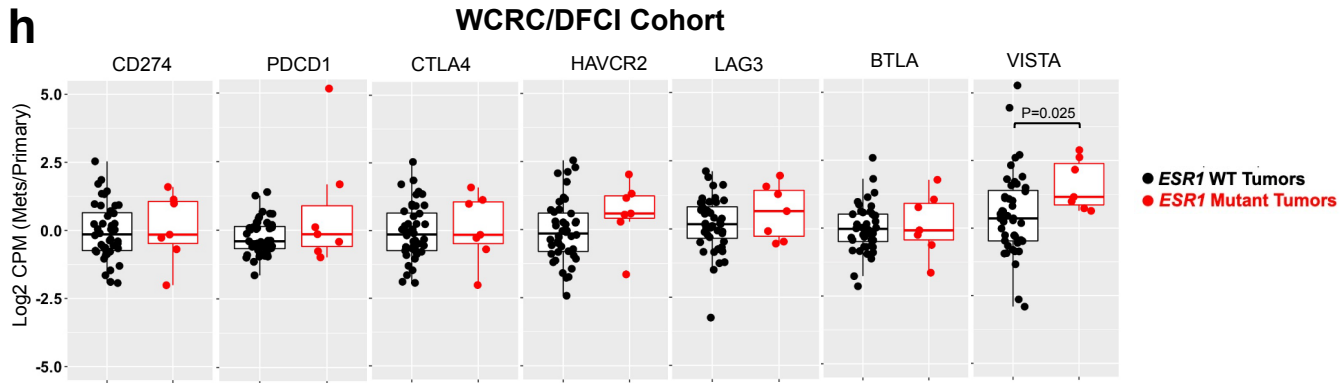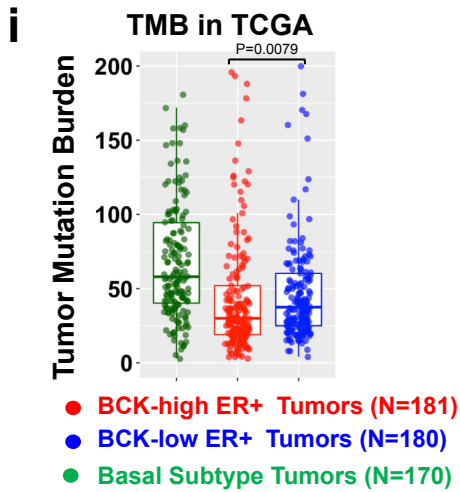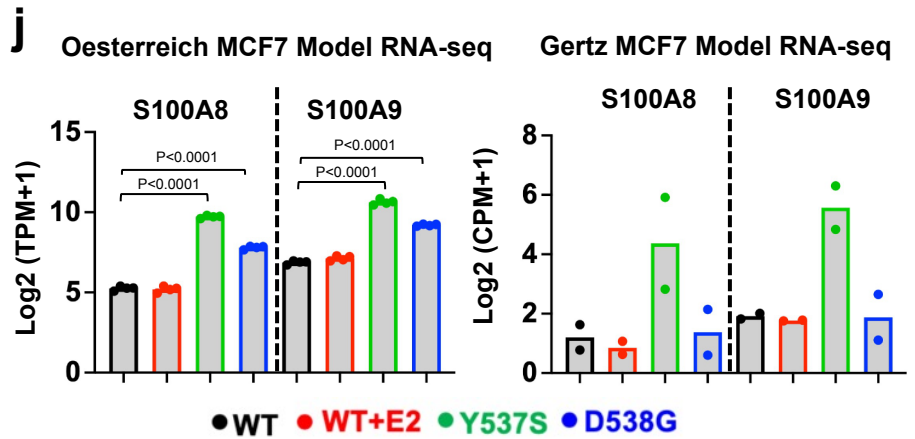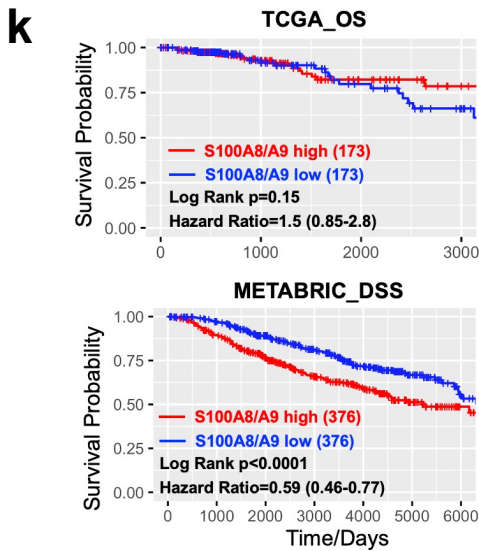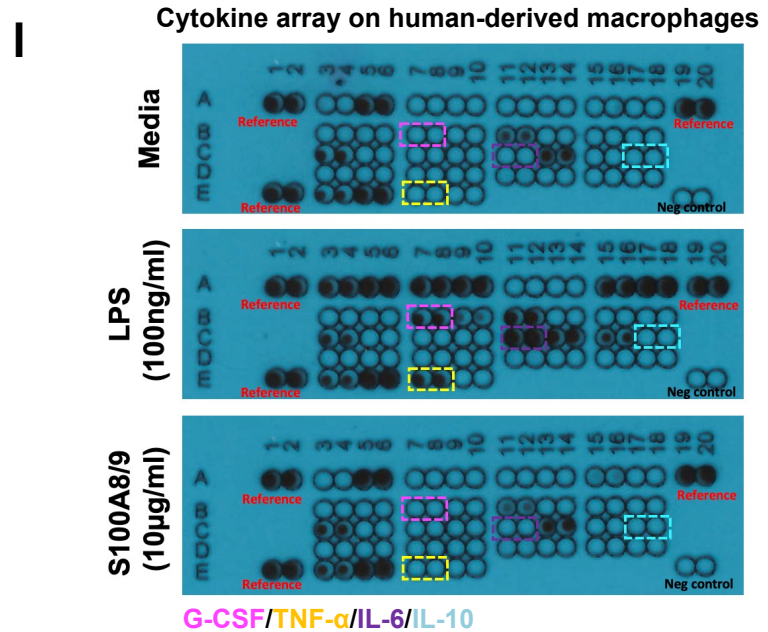

**Supplementary Figure 12. Basal cytokeratins are associated with enhanced immune activation in ER+ tumors. (Related to Fig. 5 and 6)**

a) Density plots showing the expressional distribution of BCKs GSVA scores in TCGA and METABRIC ER+ tumors for the bottom (blue) and top (red) quantile used for downstream analysis. BCKs enrichment in basal breast cancers (green) was set as control. Specific numbers of each subpopulation were indicated in the plots.

b) and c) Box plots showing the enrichment scores of the five intersected immune-related pathways between BCK-high (n=202 TCGA; n=376 METABRIC) and low (n=202 TCGA; n=376 METABRIC) subsets in ER+ tumors in METABRIC (b, Top panels) and TCGA (b, Lower panel), and between intra-patient primary tumor-paired *ESR1* mutant (n=7) and WT (n=44) metastatic lesions (c). Box plots span the upper quartile (upper limit), median (centre) and lower quartile (lower limit). Whiskers extend a maximum of 1.5X IQR. Mann Whitney U test (two-sided) was used for each comparison.

d) Dot plots showing the immune score based on ESTIMATE evaluations in BCK-high (n=20 and 57 for HER2+ and TNBC in TCGA; n=68 and 158 for HER2+ and TNBC in METABRIC) and low (n=20 and 58 for HER2+ and TNBC in TCGA; n=69 and 159 for HER2= and TNBC in METABRIC) subsets of TNBC and ER-/HER2+ tumors in TCGA and METABRIC cohorts. Specific sample numbers are labelled below each subpanel. BCK high and low subsets were separated based on median of GSVA score. Box plots span the upper quartile (upper limit), median (centre) and lower quartile (lower limit). Whiskers extend a maximum of 1.5X IQR. Mann Whitney U test (two-sided) was used.

e) Box blots representing *PDCD1* expression between BCKs-high (n=202 TCGA; n=376 METABRIC) and low (n=202 TCGA; n=376 METABRIC) ER+ tumors in TCGA and METABRIC. Log<sub>2</sub> (TPM+1) from TCGA RNA-seq and log<sub>2</sub> normalized probe intensity from METABRIC were used for plot. Box plots span the upper quartile (upper limit), median (centre) and lower quartile (lower limit). Whiskers extend a maximum of 1.5X IQR. Mann Whitney U test (two-sided) was used for each comparison.

f) Forest plot showing the hazard ratios of BCK enrichment levels together with other four key clinical features calculated in a multivariable survival analysis in TCGA (n=347) and METABRIC (n=752) ER+ tumors respectively. Data are presented as hazard ratio (dots) ± 95% CI (error bars). Log-rank test (two-sided) was applied to

compute the statistical significance of each factor within the Cox proportional hazard model. P values were labelled at the right side.

g) CD8 T cell enrichment score based on GSVA analysis of Davoli and Tamboraro signatures in basal tumors (METABRIC n=328; TCGA n=190), BCK-high (METABRIC n=376; TCGA n=202) and low (METABRIC n=376; TCGA n=202)

subsets of ER+ tumors in TCGA and METABRIC. BCKs high and low were defined by the upper and bottom quartiles of each subset. Box plots span the upper quartile (upper limit), median (centre) and lower quartile (lower limit). Whiskers extend a maximum of 1.5X IQR. Mann Whitney U test (two-sided) was used for comparison.

h) Box plots representing the seven immune checkpoint gene expression in primary-matched paired metastatic tumor samples. Log<sub>2</sub> (CPM+1) values were used for calculation. Expressional fold changes in each metastatic tumor were normalized to the matched primary tumor. Box plots span the upper quartile (upper limit), median (centre) and lower quartile (lower limit). Whiskers extend a maximum of 1.5X IQR. Mann-Whitney U test (two-sided) was performed to compare the expression between *ESR1* WT (N=44) or *ESR1* mutant (N=7) paired tumors.

i) Box plot showing comparison of tumor mutation burdens in TCGA basal subtype tumors (n=190) and BCKs high (n=202) and low (n=202) ER+ tumors. Tumor mutation burdens were calculated as 2X truncating mutation numbers + non-truncating mutation numbers of each tumor. Box plots span the upper quartile (upper limit), median (centre) and lower quartile (lower limit). Whiskers extend a maximum of 1.5X IQR. Mann Whitney U test (two-sided) was applied.

j) Bar graphic view of S100A8 and S100A9 gene expression based on RNA-seq data of Oesterreich (n=4, Log<sub>2</sub> (TPM+1)) and Gertz (n=2, Log<sub>2</sub> (CPM+1)) MCF7 *ESR1* mutant cells models. Dunnett's test was utilized for the Oesterreich model. (\*\* p<0.01)

k) Kaplan-Meier plots showing the disease-specific survival (DSS) (METABRIC) and overall survival (OS) (TCGA) comparing patients with ER+ S100A8/A9 high vs low tumors. BCKs high and low were defined by the upper and bottom quartiles of each subset. Censored patients were labelled in cross symbols. Log-rank test (two-sided) was used and hazard ratio with 95% CI were labelled.

l) Supernatants from human-derived monocytes were treated with media alone, 100ng/ml LPS, or 10µg/ml S100A8/A9 for 24 hours and analyzed by the Proteome Profiler Human Cytokine Array Kit. Images of array membranes are shown. Negative

and positive control spots are labeled and increased cytokines are highlighted. This experiment was done once.

Source data are provided as a Source Data file for a-e, g-k.

# Supplementary Figure 13

## Supplementary Figure 5a

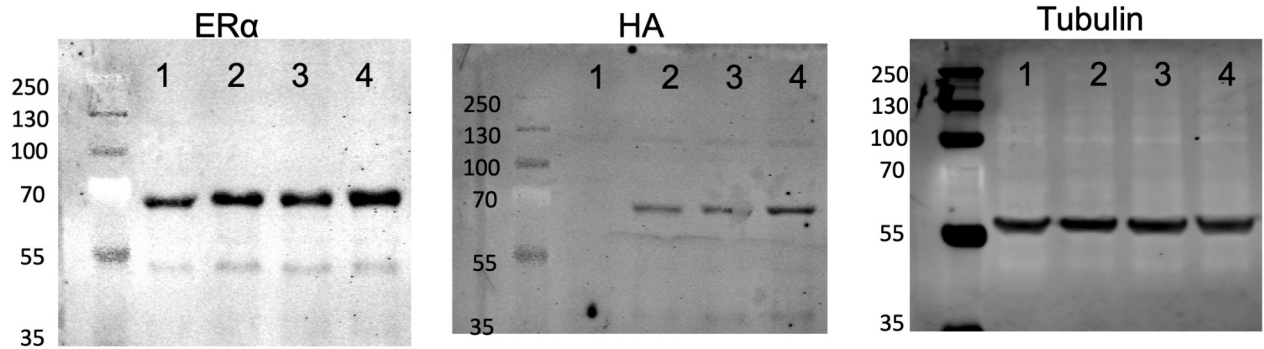

Lane1: pcDNA empty vector  
 Lane2: WT ESR1 Overexpressed MCF7  
 Lane3: Y537S ESR1 Overexpressed MCF7  
 Lane4: D538G ESR1 Overexpressed MCF7

## Supplementary Figure 6a

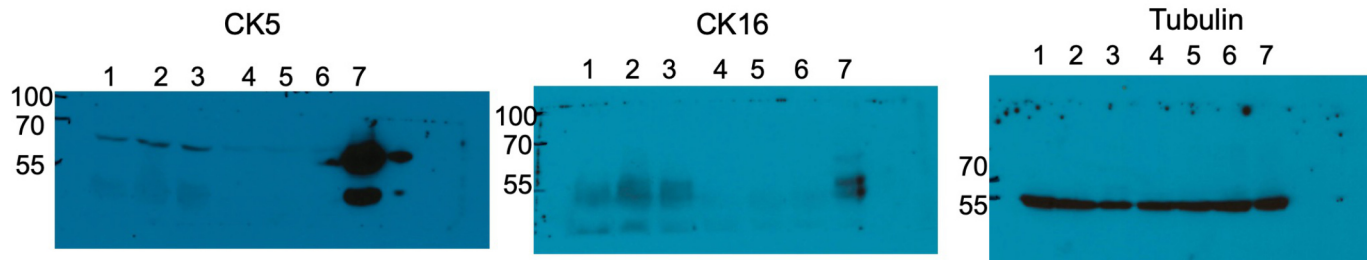

Lane1: MCF7 WT (Early Passage)  
 Lane2: MCF7 Y537S (Early Passage)  
 Lane3: MCF7 D538G (Early Passage)  
 Lane4: MCF7 WT (Late Passage)  
 Lane5: MCF7 Y537S (Late Passage)  
 Lane6: MCF7 D538G (Late Passage)  
 Lane7: MDA-MB-468

## Supplementary Figure 10e

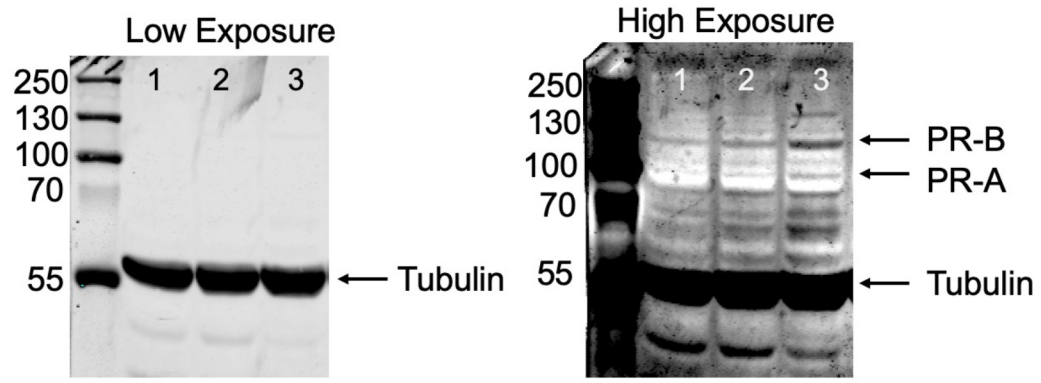

Lane1: MCF7-WT  
 Lane2: MCF7-Y537S  
 Lane3: MCF7-D538G

**Supplementary Figure 13. Images of uncropped western blots provided in the Supplementary Information file.**

**Supplementary Table and Legends**  
**Supplementary Table1**

| Pair ID | Primary Tumor ID                | Metastatic Tumor ID  | Cohort | Metastatic Site | <i>ESR1</i> Genotype | Mutation Variants |
|---------|---------------------------------|----------------------|--------|-----------------|----------------------|-------------------|
| 1       | 43P                             | 43M                  | WCRC   | Bone            | Mutation             | D538G             |
| 2       | BP72                            | BM72                 | WCRC   | Brain           | Mutation             | Y537C & L536Q     |
| 3       | 0031.50T                        | 0006.56M             | WCRC   | Ovary           | Mutation             | Y537N             |
| 4       | GP4                             | GM4B                 | WCRC   | GI              | Mutation             | Y537S & D538G     |
| 5       | 043_Archival1                   | 043_Pro prospective1 | DFCI   | Liver           | Mutation             | D538G             |
| 6       | 295_Archival1                   | 295_T2               | DFCI   | Liver           | Mutation             | E380Q             |
| 7       | 325_Archival1                   | 325_T1               | DFCI   | Liver           | Mutation             | D538G             |
| 8       | 19P                             | 19M                  | WCRC   | Bone            | WT                   |                   |
| 9       | 22P                             | 22M                  | WCRC   | Bone            | WT                   |                   |
| 10      | 31P                             | 31M                  | WCRC   | Bone            | WT                   |                   |
| 11      | 34P                             | 34M                  | WCRC   | Bone            | WT                   |                   |
| 12      | 44P                             | 44M                  | WCRC   | Bone            | WT                   |                   |
| 13      | 48P                             | 48M                  | WCRC   | Bone            | WT                   |                   |
| 14      | 55P                             | 55M                  | WCRC   | Bone            | WT                   |                   |
| 15      | 60P                             | 60M                  | WCRC   | Bone            | WT                   |                   |
| 16      | A25P                            | A25M                 | WCRC   | Bone            | WT                   |                   |
| 17      | 2P_RCS                          | 2M_RCS               | WCRC   | Brain           | WT                   |                   |
| 18      | 3P_RCS                          | 3M_RCS               | WCRC   | Brain           | WT                   |                   |
| 19      | 4P_RCS                          | 4M_RCS               | WCRC   | Brain           | WT                   |                   |
| 20      | 6P_RCS                          | 6M_RCS               | WCRC   | Brain           | WT                   |                   |
| 21      | BP7                             | BM7                  | WCRC   | Brain           | WT                   |                   |
| 22      | BP17                            | BM17                 | WCRC   | Brain           | WT                   |                   |
| 23      | BP47                            | BM47                 | WCRC   | Brain           | WT                   |                   |
| 24      | BP51                            | BM51                 | WCRC   | Brain           | WT                   |                   |
| 25      | BP62                            | BM62                 | WCRC   | Brain           | WT                   |                   |
| 26      | 0029.50T                        | 0003.56M             | WCRC   | Ovary           | WT                   |                   |
| 27      | 0030.50T                        | 0004.56M             | WCRC   | Ovary           | WT                   |                   |
| 28      | 0032.50T                        | 0008.56M             | WCRC   | Ovary           | WT                   |                   |
| 29      | 0033.50T                        | 0009.56M             | WCRC   | Ovary           | WT                   |                   |
| 30      | 0034.50T                        | 0014.56M             | WCRC   | Ovary           | WT                   |                   |
| 31      | 0035.50T                        | 0018.56M             | WCRC   | Ovary           | WT                   |                   |
| 32      | OP1                             | OM1                  | WCRC   | Ovary           | WT                   |                   |
| 33      | OP5                             | OM5A                 | WCRC   | Ovary           | WT                   |                   |
| 34      | OP5                             | OM5B                 | WCRC   | Ovary           | WT                   |                   |
| 35      | OP8                             | OM8                  | WCRC   | Ovary           | WT                   |                   |
| 36      | GP2                             | GM2A                 | WCRC   | GI              | WT                   |                   |
| 37      | GP2                             | GM2B                 | WCRC   | GI              | WT                   |                   |
| 38      | GP4                             | GM4A                 | WCRC   | GI              | WT                   |                   |
| 39      | GP7                             | GM7                  | WCRC   | GI              | WT                   |                   |
| 40      | 069_Archival1                   | 069_Pro prospective1 | DFCI   | Bone            | WT                   |                   |
| 41      | 074_Archival1                   | 074_Pro prospective1 | DFCI   | Liver           | WT                   |                   |
| 42      | 076_Archival1                   | 076_Pro prospective1 | DFCI   | Liver           | WT                   |                   |
| 43      | 188_Archival1                   | 188_Pro prospective1 | DFCI   | Bone            | WT                   |                   |
| 44      | 195_Archival1                   | 195_Pro prospective1 | DFCI   | Liver           | WT                   |                   |
| 45      | 291_Archival1/<br>291_Archival2 | 291_T1               | DFCI   | Liver           | WT                   |                   |
| 46      | 295_Archival1                   | 295_Archival2        | DFCI   | Bone            | WT                   |                   |
| 47      | 306_Archival2                   | 306_T1               | DFCI   | Breast          | WT                   |                   |
| 48      | 307_A1                          | 307_T1               | DFCI   | Liver           | WT                   |                   |
| 49      | 348_A1                          | 348_T1               | DFCI   | Liver           | WT                   |                   |
| 50      | 381_A1                          | 381_T1               | DFCI   | Liver           | WT                   |                   |
| 51      | 495_A1                          | 495_T1               | DFCI   | Liver           | WT                   |                   |

**Supplementary Table1.** Detailed intra-patient primary metastasis paired sample identities and *ESR1* mutation information from WCRC and DFCI cohort used in this study.



**Supplementary Table 2**

| Rank | Gene            | Log2FC<br>(ESR1 Mutant Tumor/WT<br>Tumor) | Log2FC<br>(MCF7 Y537S /MCF7<br>WT) | Log2FC<br>(MCF7 D538G /MCF7 WT) |
|------|-----------------|-------------------------------------------|------------------------------------|---------------------------------|
| 1    | <i>KRT6B</i>    | 3.75                                      | 6.14                               | 4.12                            |
| 2    | <i>KRT17</i>    | 3.27                                      | 5.84                               | 3.59                            |
| 3    | <i>KRT16</i>    | 3.01                                      | 5.63                               | 3.84                            |
| 4    | <i>S100A7</i>   | 0.48                                      | 7.03                               | 4.07                            |
| 5    | <i>KRT6A</i>    | 2.30                                      | 5.78                               | 3.35                            |
| 6    | <i>IFI27</i>    | 2.36                                      | 3.40                               | 4.65                            |
| 7    | <i>KRT6C</i>    | 2.32                                      | 4.37                               | 3.04                            |
| 8    | <i>SPRR1A</i>   | 0.67                                      | 5.84                               | 3.16                            |
| 9    | <i>KRT5</i>     | 3.51                                      | 3.69                               | 2.34                            |
| 10   | <i>PI3</i>      | -0.03                                     | 6.21                               | 2.89                            |
| 11   | <i>SLPI</i>     | 1.70                                      | 4.00                               | 2.50                            |
| 12   | <i>S100A8</i>   | 1.07                                      | 4.46                               | 2.54                            |
| 13   | <i>S100A9</i>   | 1.71                                      | 3.76                               | 2.33                            |
| 14   | <i>SPRR1B</i>   | 0.25                                      | 5.12                               | 2.22                            |
| 15   | <i>CALML5</i>   | 0.53                                      | 4.99                               | 1.44                            |
| 16   | <i>DSG1</i>     | 1.43                                      | 3.42                               | 2.03                            |
| 17   | <i>S100A2</i>   | 0.45                                      | 4.31                               | 1.87                            |
| 18   | <i>FABP5</i>    | 0.83                                      | 3.34                               | 2.40                            |
| 19   | <i>IFIT3</i>    | 0.70                                      | 2.43                               | 3.01                            |
| 20   | <i>IFI44</i>    | -0.37                                     | 2.91                               | 3.59                            |
| 21   | <i>SBSN</i>     | 1.05                                      | 3.90                               | 1.12                            |
| 22   | <i>KRT79</i>    | 0.08                                      | 4.74                               | 1.20                            |
| 23   | <i>AKR1C2</i>   | 1.64                                      | 2.79                               | 1.22                            |
| 24   | <i>SERPINB5</i> | 0.75                                      | 3.29                               | 1.39                            |
| 25   | <i>AMIGO2</i>   | -0.01                                     | 2.58                               | 2.63                            |
| 26   | <i>SAMD9</i>    | -0.51                                     | 2.32                               | 3.23                            |
| 27   | <i>GJA1</i>     | -0.29                                     | 3.36                               | 1.59                            |
| 28   | <i>KRT14</i>    | 3.68                                      | 0.55                               | 0.41                            |
| 29   | <i>IVL</i>      | 0.46                                      | 3.17                               | 0.85                            |
| 30   | <i>CTSC</i>     | 1.37                                      | 1.83                               | 1.22                            |
| 31   | <i>TUBA4A</i>   | 1.18                                      | 2.09                               | 1.13                            |
| 32   | <i>CEBPB</i>    | 2.08                                      | 1.47                               | 0.83                            |
| 33   | <i>SLC7A5</i>   | 1.57                                      | 1.29                               | 1.51                            |
| 34   | <i>LCN2</i>     | 0.33                                      | 3.19                               | 0.69                            |
| 35   | <i>GAL</i>      | 1.02                                      | 1.24                               | 1.90                            |
| 36   | <i>CALB2</i>    | 1.34                                      | 1.06                               | 1.65                            |
| 37   | <i>SLC16A1</i>  | 0.09                                      | 1.86                               | 1.91                            |
| 38   | <i>KLK6</i>     | 0.13                                      | 3.38                               | 0.29                            |
| 39   | <i>C1R</i>      | 2.08                                      | 0.89                               | 0.72                            |
| 40   | <i>UBD</i>      | 3.04                                      | 0.78                               | -0.23                           |
| 41   | <i>MT2A</i>     | 1.36                                      | 1.19                               | 1.02                            |
| 42   | <i>TRIM29</i>   | 1.22                                      | 1.61                               | 0.71                            |
| 43   | <i>RHCG</i>     | 0.94                                      | 2.29                               | 0.20                            |
| 44   | <i>ANP32E</i>   | 1.60                                      | 0.67                               | 1.00                            |
| 45   | <i>IL18</i>     | 0.44                                      | 1.69                               | 1.10                            |
| 46   | <i>MT1X</i>     | 1.77                                      | 0.73                               | 0.71                            |
| 47   | <i>CASP4</i>    | 1.12                                      | 0.88                               | 1.19                            |
| 48   | <i>IGFBP6</i>   | 1.14                                      | 1.00                               | 1.02                            |
| 49   | <i>LEMD1</i>    | 0.09                                      | 0.84                               | 2.19                            |
| 50   | <i>PLSCR1</i>   | 0.30                                      | 1.25                               | 1.53                            |

**Supplementary Table2.** Top 50 consistently increased basal markers in MCF7 *ESR1* mutant cell models and clinical samples compared to WT counterparts. Six basal cytokeratins are highlighted in yellow.

**Supplementary Table 3**

| Rank | Gene           | Log2FC<br>(T47D Y537S /T47D WT) | Log2FC<br>(T47D D538G /T47D WT) |
|------|----------------|---------------------------------|---------------------------------|
| 1    | <i>WLS</i>     | 1.35                            | 1.07                            |
| 2    | <i>HTRA1</i>   | 1.08                            | 1.05                            |
| 3    | <i>PSAT1</i>   | 2.03                            | 0.09                            |
| 4    | <i>IGF2BP2</i> | 1.27                            | 0.66                            |
| 5    | <i>AKR1C2</i>  | 0.46                            | 1.10                            |
| 6    | <i>TUBB6</i>   | 0.76                            | 0.67                            |
| 7    | <i>KIRREL</i>  | 0.73                            | 0.69                            |
| 8    | <i>DMD</i>     | 1.16                            | 0.26                            |
| 9    | <i>ATP1B3</i>  | 0.93                            | 0.33                            |
| 10   | <i>FZD6</i>    | 0.26                            | 0.98                            |
| 11   | <i>SFN</i>     | 0.34                            | 0.90                            |
| 12   | <i>AKR1C1</i>  | 0.59                            | 0.61                            |
| 13   | <i>ZDHHC2</i>  | 0.68                            | 0.45                            |
| 14   | <i>AMD1</i>    | 0.46                            | 0.67                            |
| 15   | <i>CORO1C</i>  | 0.67                            | 0.44                            |
| 16   | <i>CLMP</i>    | 0.32                            | 0.78                            |
| 17   | <i>STK17A</i>  | 0.41                            | 0.63                            |
| 18   | <i>LARP6</i>   | 0.38                            | 0.58                            |
| 19   | <i>PLS3</i>    | 0.38                            | 0.52                            |
| 20   | <i>FAM83D</i>  | 0.28                            | 0.61                            |
| 21   | <i>FSCN1</i>   | 0.59                            | 0.27                            |
| 22   | <i>FERMT1</i>  | 0.31                            | 0.54                            |
| 23   | <i>LAMB3</i>   | 0.80                            | 0.03                            |
| 24   | <i>CXCL1</i>   | 0.83                            | 0.00                            |
| 25   | <i>TKT</i>     | 0.21                            | 0.62                            |
| 26   | <i>OSMR</i>    | 0.60                            | 0.22                            |
| 27   | <i>CASP1</i>   | 0.71                            | 0.10                            |
| 28   | <i>BMP1</i>    | 0.22                            | 0.59                            |
| 29   | <i>ACTN1</i>   | 0.74                            | 0.06                            |
| 30   | <i>ANXA2</i>   | 0.15                            | 0.62                            |
| 31   | <i>OSBPL3</i>  | 0.15                            | 0.60                            |
| 32   | <i>PGM2</i>    | 0.12                            | 0.62                            |
| 33   | <i>GPSM2</i>   | 0.38                            | 0.33                            |
| 34   | <i>LOX</i>     | 0.36                            | 0.34                            |
| 35   | <i>MT2A</i>    | 0.57                            | 0.09                            |
| 36   | <i>ANTXR1</i>  | 0.28                            | 0.37                            |
| 37   | <i>CFL2</i>    | 0.51                            | 0.13                            |
| 38   | <i>SLC1A3</i>  | 0.14                            | 0.48                            |
| 39   | <i>LAMC2</i>   | 0.44                            | 0.17                            |
| 40   | <i>ARNTL2</i>  | 0.58                            | 0.02                            |
| 41   | <i>CXCL3</i>   | 0.54                            | 0.06                            |
| 42   | <i>SH3D19</i>  | 0.34                            | 0.24                            |
| 43   | <i>TWSG1</i>   | 0.26                            | 0.32                            |
| 44   | <i>DGKA</i>    | 0.28                            | 0.30                            |
| 45   | <i>S100A10</i> | 0.20                            | 0.33                            |
| 46   | <i>FBLIM1</i>  | 0.31                            | 0.21                            |
| 47   | <i>AKR1C3</i>  | 0.17                            | 0.35                            |
| 48   | <i>YBX1</i>    | 0.10                            | 0.42                            |
| 49   | <i>TBC1D1</i>  | 0.32                            | 0.19                            |
| 50   | <i>ADORA2B</i> | 0.42                            | 0.09                            |

**Supplementary Table3.** Top 50 consistently increased basal markers in T47D *ESR1* mutant cell models compared to WT cells.

**Supplementary Table 4**

| Groups      | #reads   | %mapped | # ER binding peaks ( $p < 10^{-5}$ ) |
|-------------|----------|---------|--------------------------------------|
| WT-Input    | 16856221 | 94.21   |                                      |
| WT-veh      | 23447868 | 85      | 125                                  |
| WT-E2       | 16375519 | 89.15   | 12472                                |
| Y537S-Input | 17529190 | 92.47   |                                      |
| Y537S-veh   | 20516994 | 90.35   | 657                                  |
| Y537S-E2    | 20680234 | 89.81   | 1847                                 |
| D538G-Input | 20702360 | 82.44   |                                      |
| D538G-veh   | 20222723 | 87.33   | 1016                                 |
| D538G-E2    | 20606853 | 91.4    | 5403                                 |

**Supplementary Table 4.** ER ChIP-seq mapping quality control of MCF7 ESR1 WT and mutant cells. P-value for each peak were calculated by MACS2 using a dynamic Poisson distribution to capture local biases in read background levels.

## Supplementary Table 5

| METABRIC BCKs High ER+ Tumors     | TCGA BCKs High ER+ Tumors         | WCRC/DFCI ESR1 Mutant Tumors    |
|-----------------------------------|-----------------------------------|---------------------------------|
| EPITHELIAL_MESENCHYMAL_TRANSITION | EPITHELIAL_MESENCHYMAL_TRANSITION | INTERFERON_GAMMA_RESPONSE       |
| APICAL_JUNCTION                   | MYOGENESIS                        | TNFA_SIGNALING_VIA_NFKB         |
| KRAS_SIGNALING_UP                 | APICAL_JUNCTION                   | IL6_JAK_STAT3_SIGNALING         |
| TNFA_SIGNALING_VIA_NFKB           | TNFA_SIGNALING_VIA_NFKB           | APOPTOSIS                       |
| ANGIOGENESIS                      | COAGULATION                       | ALLOGRAFT_REJECTION             |
| MYOGENESIS                        | KRAS_SIGNALING_DN                 | REACTIVE_OXIGEN_SPECIES_PATHWAY |
| WNT_BETA_CATENIN_SIGNALING        | KRAS_SIGNALING_UP                 | IL2_STAT5_SIGNALING             |
| COAGULATION                       | WNT_BETA_CATENIN_SIGNALING        | INFLAMMATORY_RESPONSE           |
| UV_RESPONSE_DN                    | ANGIOGENESIS                      | COMPLEMENT                      |
| NOTCH_SIGNALING                   | NOTCH_SIGNALING                   | HYPOXIA                         |
| TGF_BETA_SIGNALING                | P53_PATHWAY                       | P53_PATHWAY                     |
| HYPOXIA                           | HYPOXIA                           |                                 |
| HEDGEHOG_SIGNALING                | APICAL_SURFACE                    |                                 |
| IL2_STAT5_SIGNALING               | HEDGEHOG_SIGNALING                |                                 |
| INFLAMMATORY_RESPONSE             | IL6_JAK_STAT3_SIGNALING           |                                 |
| IL6_JAK_STAT3_SIGNALING           | INFLAMMATORY_RESPONSE             |                                 |
| APICAL_SURFACE                    | IL2_STAT5_SIGNALING               |                                 |
| P53_PATHWAY                       | ALLOGRAFT_REJECTION               |                                 |
| ALLOGRAFT_REJECTION               | UV_RESPONSE_DN                    |                                 |
|                                   | XENOBIOTIC_METABOLISM             |                                 |

**Supplementary Table 5.** Significantly enriched hallmark gene sets in BCK high vs low ER+ tumors in TCGA and METABRIC and ESR1 mutant vs WT tumors in WCRC/DFCI cohorts.

**Supplementary Table 6**

| Sample Number | Sample ID | <i>ESR1</i> Genotype | Mutation Subtype | cfDNA MAF% |
|---------------|-----------|----------------------|------------------|------------|
| 1             | TP17-M767 | Mutation             | Y537C            | 0.18       |
| 2             | TP17-M773 | Mutation             | D538G            | 0.44       |
| 3             | TP17-M781 | Mutation             | D538G            | 0.24       |
| 4             | TP17-M788 | Mutation             | D538G; Y537N     | 3; 1.5     |
| 5             | TP17-M834 | Mutation             | Y537C            | 0.6        |
| 6             | TP17-M835 | Mutation             | Y537C; D538G     | 0.33; 0.26 |
| 7             | TP17-M840 | Mutation             | Y537C            | 0.7        |
| 8             | TP17-M847 | Mutation             | D538G            | 0.45       |
| 9             | TP18-M11  | Mutation             | D538G            | 17.7       |
| 10            | TP18-M16  | Mutation             | D538G            | 0.75       |
| 11            | TP18-M25  | Mutation             | D538G            | 0.22       |
| 12            | TP17-M768 | WT                   |                  |            |
| 13            | TP17-M841 | WT                   |                  |            |
| 14            | TP17-M848 | WT                   |                  |            |
| 15            | TP17-M888 | WT                   |                  |            |
| 16            | TP18-M10  | WT                   |                  |            |
| 17            | TP18-M9   | WT                   |                  |            |
| 18            | TP18-M17  | WT                   |                  |            |

**Supplementary Table 6.** Detailed sample identities and *ESR1* mutation status identified by plasma screen from 18 patients with ER+ metastatic breast cancer.

## Supplementary Table 7

### Primers for qRT-PCR

| Gene         | Forward                 | Reverse                |
|--------------|-------------------------|------------------------|
| <i>RPLP0</i> | TAAACCCTGCGTGGCAATC     | TTGTCTGCTCCCACAATGAAA  |
| <i>ESR1</i>  | CGCCCCATATTTTGAACACAG   | ACGAGTATGGAGAGTGTCCAGG |
| <i>PGR</i>   | TCGATGCTAGAAAACCTCCTTGG | GTCAACTCCAGGACCTCTTATG |
| <i>CTCF</i>  | GCCATTC AAGTGTCCATGTG   | CTCATGTGCCTTTTCAGCTTG  |
| <i>KRT5</i>  | TCAATCCGAAGGCAGAAACG    | TGCGGTATGTAACCTGCTGG   |
| <i>KRT6A</i> | TCCCCTCAACCTGCAAATC     | CCACTTTGTTCCAGAACCTTG  |
| <i>KRT6B</i> | AGCTGAGAAACATGCAGGAC    | GCTTGCAGTTCAACCTTGTTCC |
| <i>KRT14</i> | GAATCGTATCTCTGGAGCCTG   | TGCCATCTCTTGTCTTACTG   |
| <i>KRT16</i> | GAAGTCCAAGTCTTCCCAGTC   | GATATCCCCTATGAGCCATTCC |
| <i>KRT17</i> | GGATCGGGTTAAGGGAAAGAG   | AGGAGACATAGGCGAGAGG    |

### Primers for ChIP-qPCR

| Binding Sites | Forward             | Reverse                  |
|---------------|---------------------|--------------------------|
| CTCF_Peak1    | ACTGTGGTTTCTCTGACGC | TGAACAAGAGCCTATAAAAACCCC |
| CTCF_Peak5    | AAAAGCTCTCGTGGGTTCC | AGCAGGGACGAAGTGAAAC      |

**Supplementary Table 7.** Sequence information primers used in this study.

## Supplementary Table 8

| Description                                                     | PMID       | Source                  | Unique ID   |
|-----------------------------------------------------------------|------------|-------------------------|-------------|
| TCGA RNA-seq                                                    | 26209429   | Gene Expression Omnibus | GSE62944    |
| METABRIC Expression Matrix                                      | 22522925   | Synapse                 | Syn1688369  |
| Single-cell RNA-seq in two bilateral bone metastasos            | This Study | Gene Expression Omnibus | GSE190772   |
| Oesterreich MCF7/T47D ESR1 mutant cells RNA-seq                 | 28535794   | Gene Expression Omnibus | GSE89888    |
| Oesterreich MCF7 ESR1 mutant cells ChIP-seq                     | This Study | Gene Expression Omnibus | GSE125117   |
| Gertz MCF7/T47D ESR1 mutant cells RNA-seq/ChIP-seq              | 33184109   | Gene Expression Omnibus | GSE148279   |
| Ali MCF7 ESR1 mutant RNA-seq/ChIP-seq                           | 27748765   | Gene Expression Omnibus | GSE78286    |
| Brown MCF7 ESR1 mutant RNA-seq/ChIP-seq                         | 29438694   | Gene Expression Omnibus | GSE94493    |
| Shapiro T47D ESR1 mutant RNA-seq                                | 30419347   | Gene Expression Omnibus | GSE108304   |
| MCF7 CTCF Knockdown RNA-seq                                     | 27638884   | Gene Expression Omnibus | GSE85088    |
| MCF7 CTCF ChIP-seq                                              | 22955616   | ENCODE                  | ENCSR560BUE |
| MCF7 RAD21 ChIP-seq                                             | 29126249   | ENCODE                  | ENCSR703TNG |
| MCF7 STAG1 ChIP-seq                                             | 20219941   | Gene Expression Omnibus | GSE25021    |
| MCF7 SMC1A ChIP-seq                                             | 27739523   | Gene Expression Omnibus | GSE76893    |
| MCF7 CTCF ChIP-PET                                              | 27625391   | Gene Expression Omnibus | GSE72816    |
| MCF7 Hi-C                                                       | 31949157   | Gene Expression Omnibus | GSE130916   |
| MCF7 PR ChIP-seq with vehicle, R5020 and progesterone treatment | 26153859   | Gene Expression Omnibus | GSE68359    |
| MCF7 GR ChIP-seq with dexamethasone treatment                   | 27062924   | Gene Expression Omnibus | GSE72249    |
| MCF7 ATAC-seq                                                   | 29867222   | Gene Expression Omnibus | GSE102441   |
| MCF7 H3K4me2 ChIP-seq                                           | 22955616   | ENCODE                  | ENCSR875KOJ |
| MCF7 H3K4me3 ChIP-seq                                           | 29126249   | ENCODE                  | ENCSR958MIB |
| MCF7 H3K9ac ChIP-seq                                            | 22955616   | ENCODE                  | ENCSR056UBA |
| MCF7 H3K27ac ChIP-seq                                           | 29126249   | ENCODE                  | ENCSR752UOD |
| T47D H3K27ac ChIP-seq                                           | 26051943   | Gene Expression Omnibus | GSE69112    |
| ZR75-30 H3K27ac ChIP-seq                                        | 26051943   | Gene Expression Omnibus | GSE69112    |
| MM231 H3K27ac ChIP-seq                                          | 26051943   | Gene Expression Omnibus | GSE69112    |
| MM468 H3K27ac ChIP-seq                                          | 26406377   | Gene Expression Omnibus | GSE65201    |
| HCC1954 H3K27ac ChIP-seq                                        | 22156296   | Gene Expression Omnibus | GSE29069    |
| TCGA ATAC-seq                                                   | 30361341   | Gemonic Data Commons    |             |
| MCF7 tamoxifen resistant cell model RNA-seq                     | 32424275   | Gene Expression Omnibus | GSE128458   |
| MCF7 tamoxifen and fulvestrant resistant cell model RNA-seq     | 30472020   | Gene Expression Omnibus | GSE104985   |
| MCF7/T47D/ZR75-1/BT474 tamoxifen resistant cell model RNA-seq   | 30143015   | Gene Expression Omnibus | GSE111151   |
| MCF7 tamoxifen resistant cell model microarray                  | 21233418   | Gene Expression Omnibus | GSE26459    |
| MCF7 tamoxifen resistant cell model RNA-seq                     | 31644911   | Gene Expression Omnibus | GSE106681   |
| MCF7 fulvestrant resistant cell model RNA-seq                   | 31949157   | Gene Expression Omnibus | GSE118713   |
| SUM44 tamoxifen resistant cell model microarray                 | 18974135   | Gene Expression Omnibus | GSE12708    |
| MCF7/T47D/ZR75-1/HCC1428/SUM44 LTED cell model microarray       | 27246191   | Gene Expression Omnibus | GSE75971    |
| SUM44/MM134 LTED cell model microarray                          | 30180878   | Gene Expression Omnibus | GSE116744   |
| MM134VI and SUM44 E2 treated microarray                         | 24425047   | Gene Expression Omnibus | GSE50693    |
| ZR75-1 E2 treated microarray                                    | 23023562   | Gene Expression Omnibus | GSE38132    |
| BT474 E2 treated microarray                                     | 16606439   | Gene Expression Omnibus | GSE3834     |

**Supplementary Table 8.** Sources of all the publicly available data used in this study.
