# Supplementary material for: ESR1 mutant breast cancers show elevated basal cytokeratins and immune activation
Source: PubMed Central journal article supplement (PMC9019037; doi:10.1038/s41467-022-29498-9), 2022-04-19
Supplement: 41467_2022_29498_MOESM4_ESM.pdf [file 41467_2022_29498_MOESM4_ESM.pdf]

**Title:** Supplementary Data1:

**Description:** Five pairs of luminal and basal gene sets used in this study.

**Title:** Supplementary Data2:

**Description:** PAM50 identity and original source of 97 breast cancer cell lines transcriptomic data used in this study
